# Supplementary material for: NIS-Mediated intermolecular hydroamination of allenamides with imidazole heterocycles: a facile protocol for the synthesis of allylic N,N-acetals
Source: Royal Society of Chemistry journal article supplement (doi:10.1039/c8nj03641a), 2018-01-01

## Supporting Information For

### NIS-Mediated intermolecular hydroamination of allenamides with imidazole heterocycles: a facile protocol for the synthesis of allylic N,N-acetals

Yan Li, Guo Li Luo, Xiao Xiao Li,\* and Zhi Gang Zhao\*

School of Chemistry and Environmental Protection Engineering, Southwest Minzu  
University, Chengdu 610041, P. R. China.

[lixiaoxiao.2005@163.com](mailto:lixiaoxiao.2005@163.com)

[zzg63129@163.com](mailto:zzg63129@163.com)

## CONTENTS

|                                                                                 |         |
|---------------------------------------------------------------------------------|---------|
| NOE spectra of <b>4ad</b> .....                                                 | S2      |
| <sup>1</sup> H and <sup>13</sup> C NMR spectra of <b>4b</b> and <b>4c</b> ..... | S3-S4   |
| <sup>1</sup> H and <sup>13</sup> C NMR spectra of <b>4aa–4ma</b> .....          | S5-S17  |
| <sup>1</sup> H and <sup>13</sup> C NMR spectra of <b>4ab–4al</b> .....          | S18-S31 |
| <sup>1</sup> H and <sup>13</sup> C NMR spectra of <b>5ah</b> .....              | S32     |

## NOE spectra of 4ad

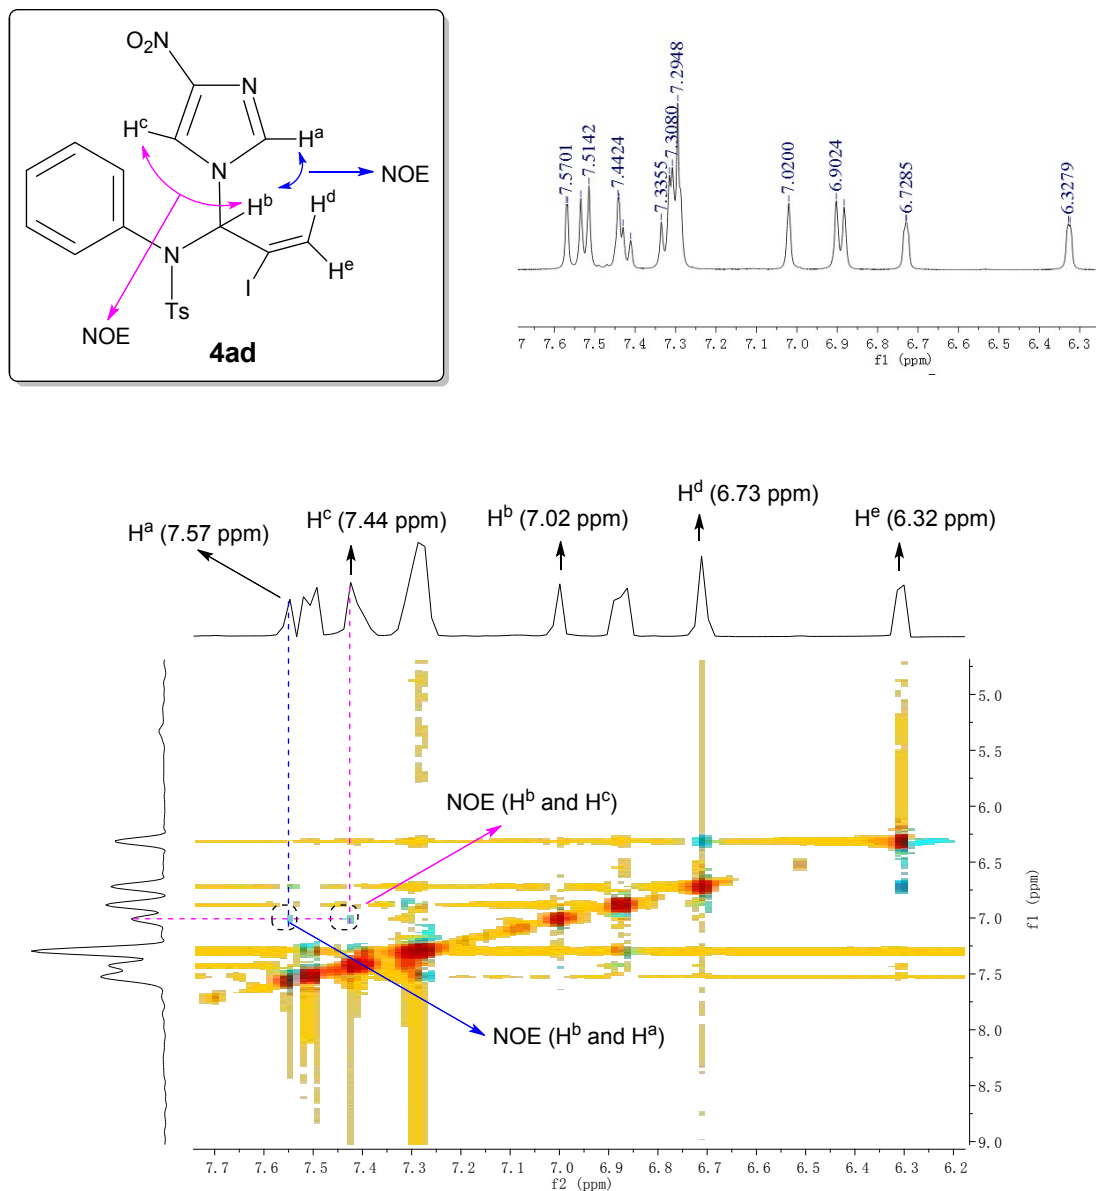

The NOE of H<sup>b</sup> and H<sup>c</sup>, H<sup>b</sup> and H<sup>a</sup> indicates that the 4ad was N<sup>1</sup>-substituted product.

# <sup>1</sup>H and <sup>13</sup>C NMR spectra of 4b and 4c

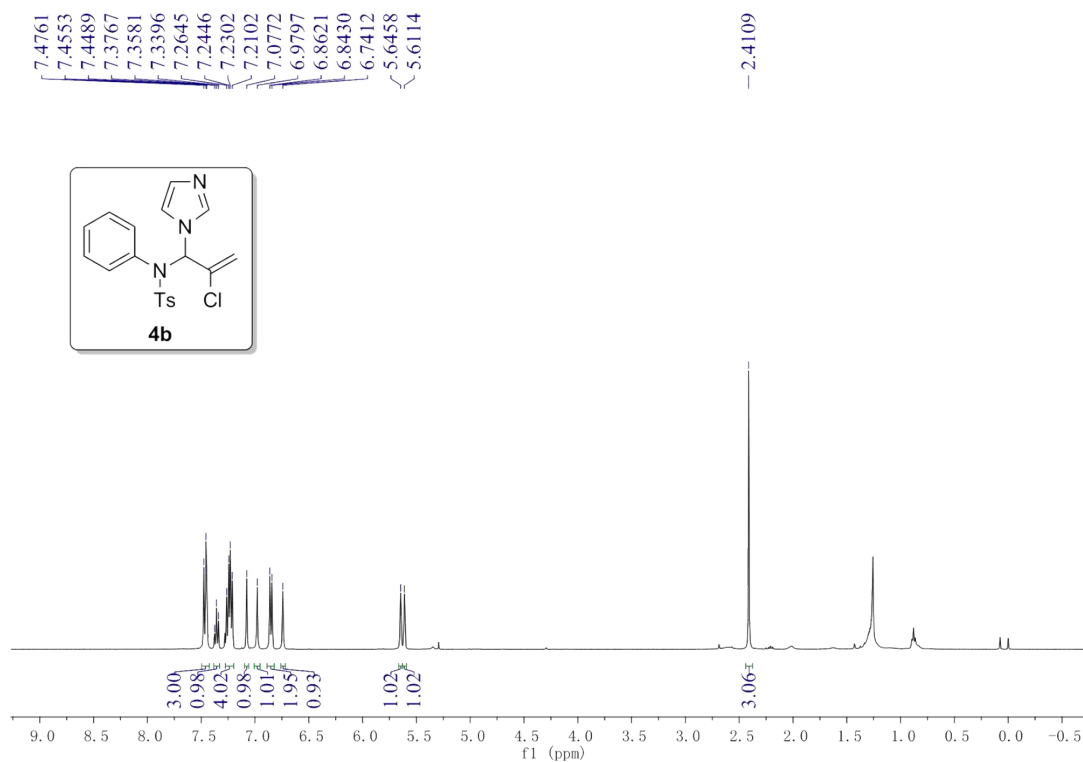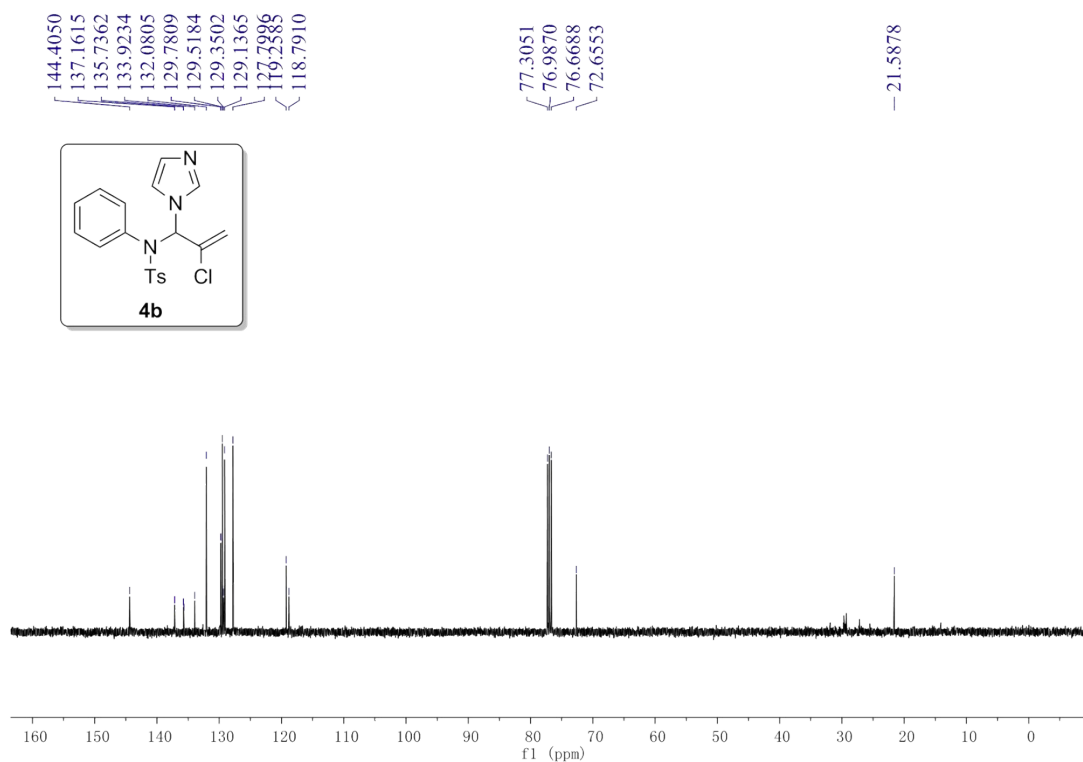

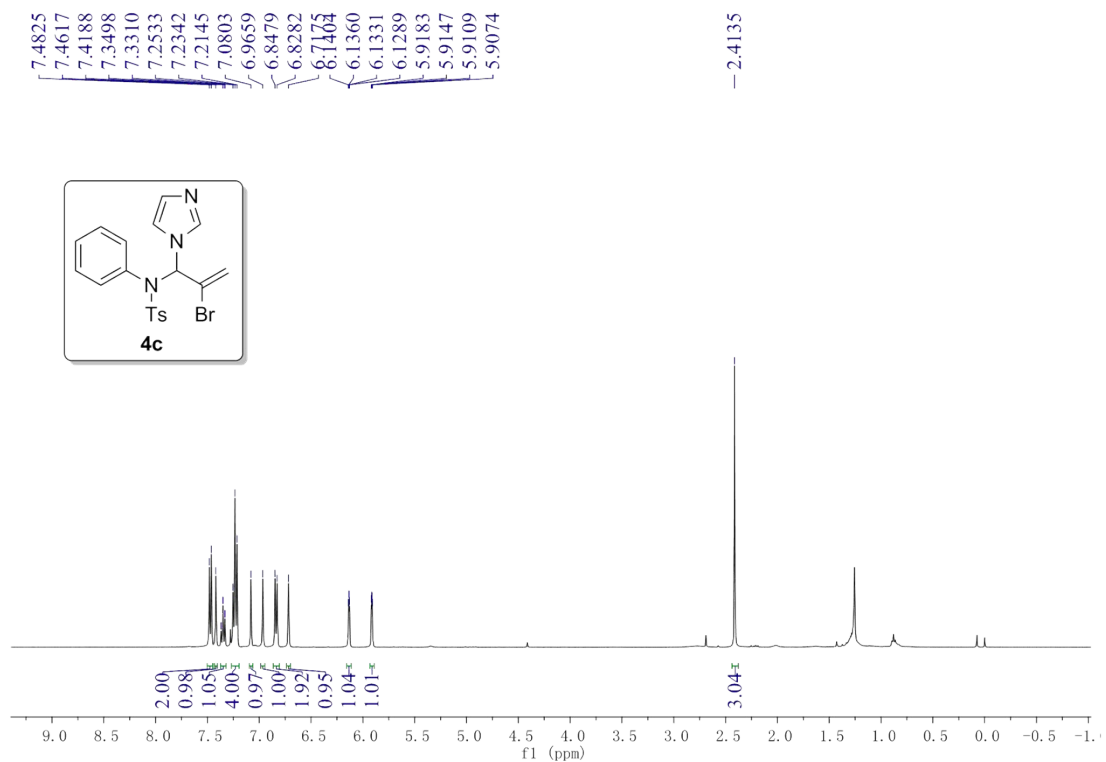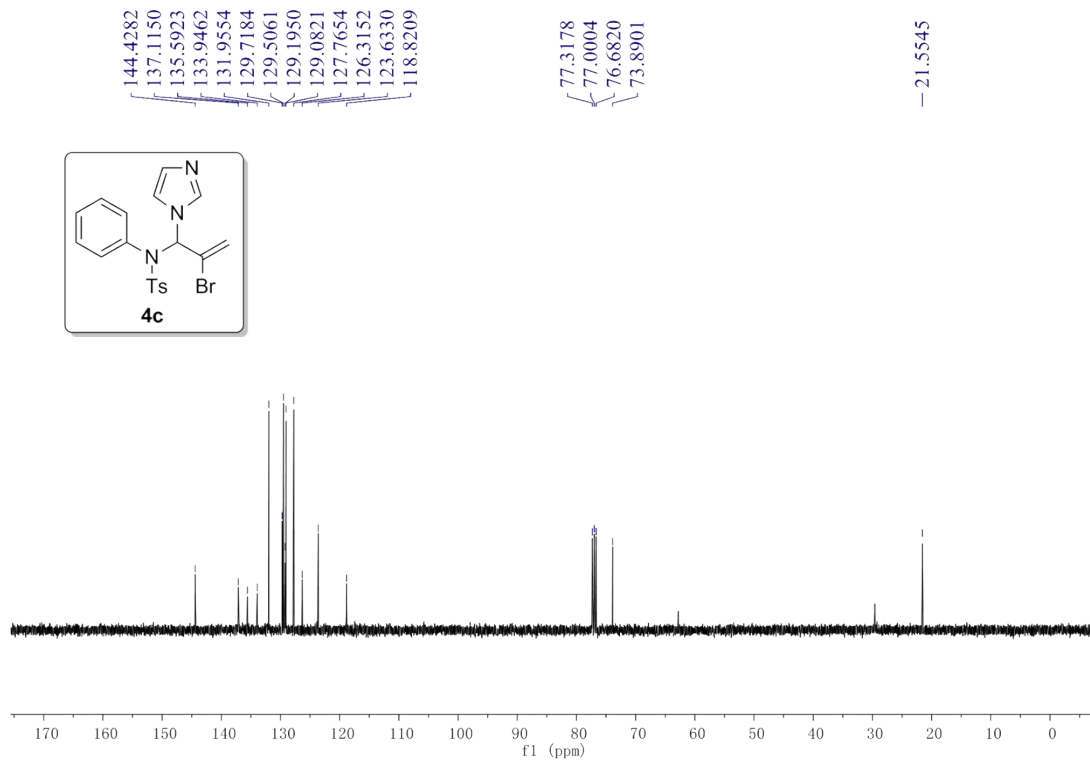



**$^1\text{H}$  and  $^{13}\text{C}$  NMR spectra of 4aa–4ma**

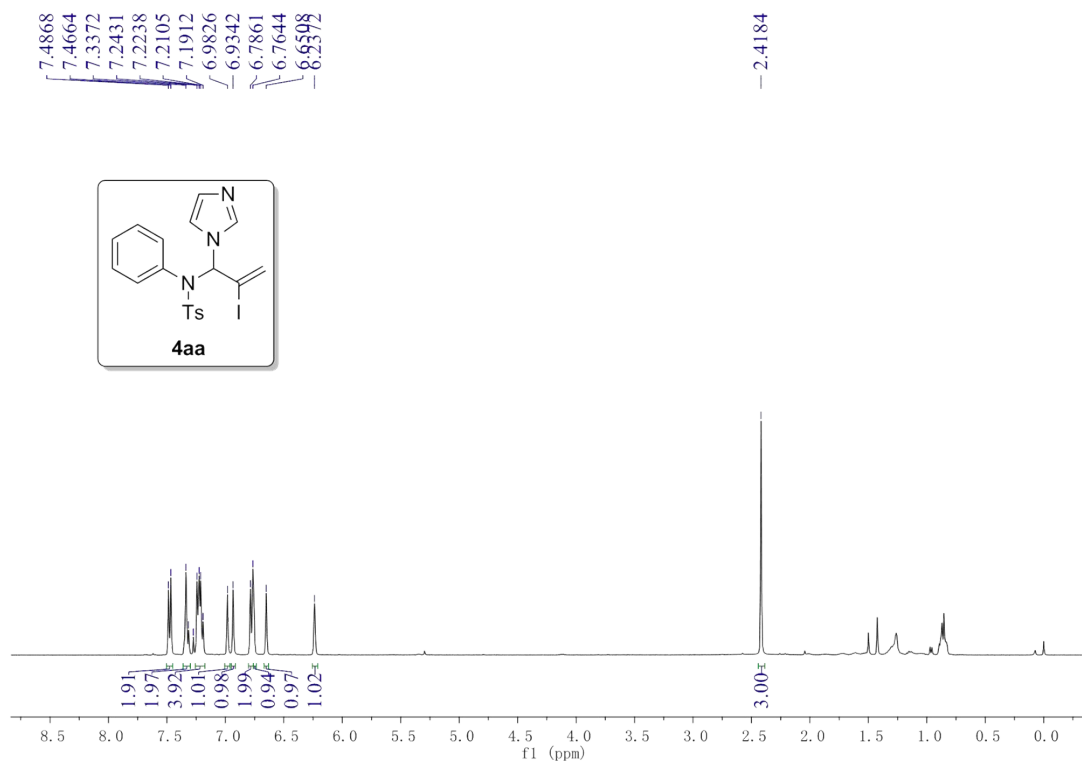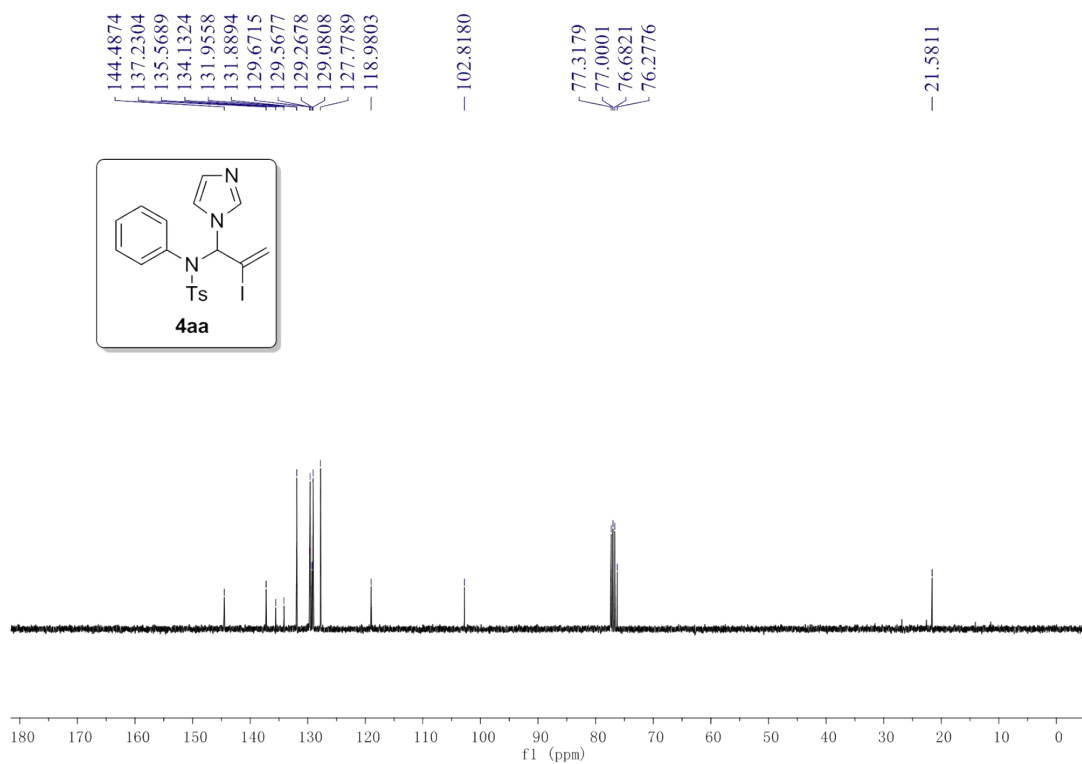

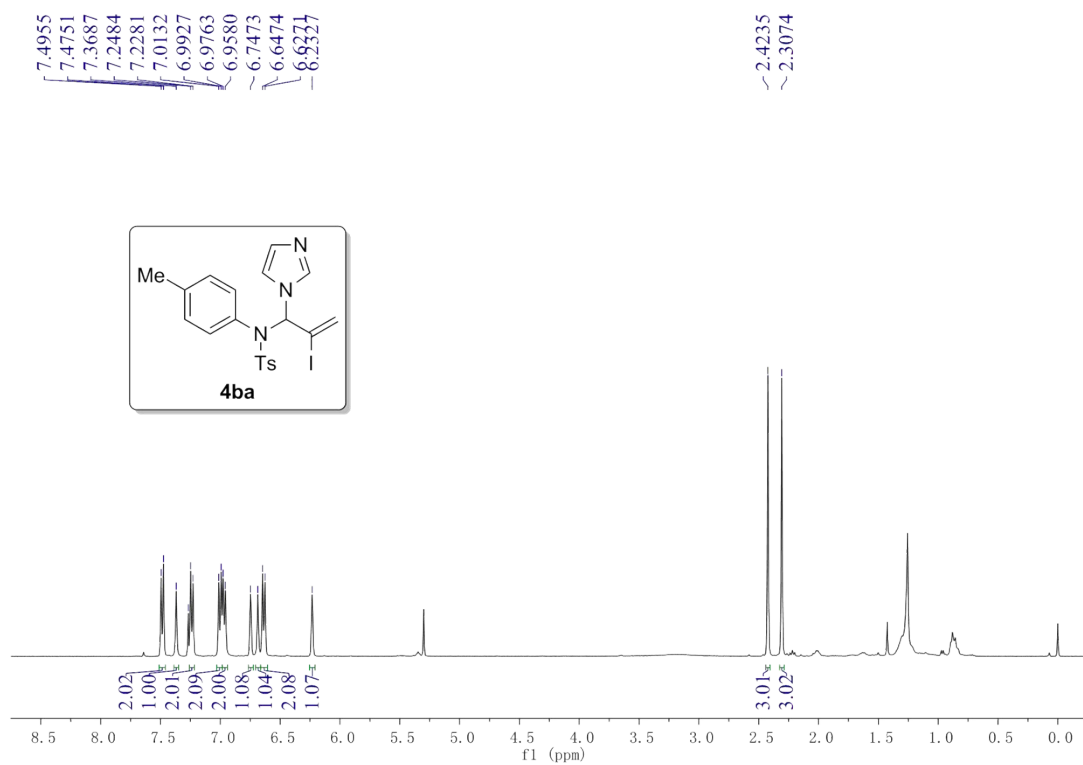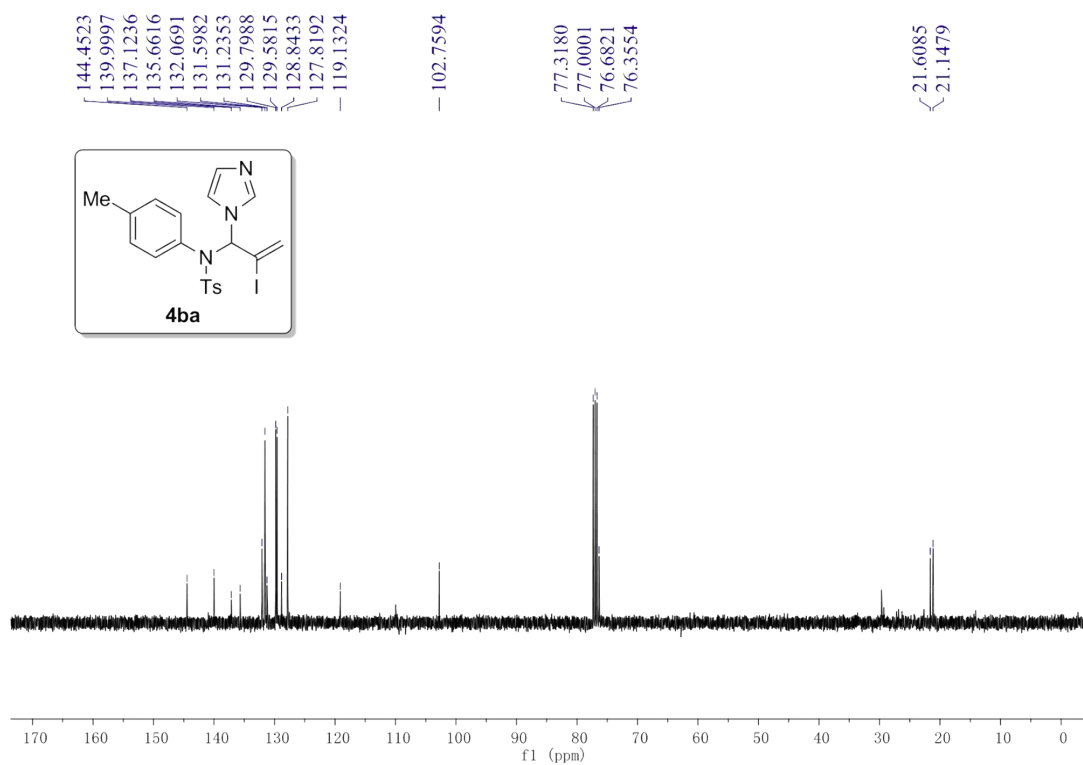

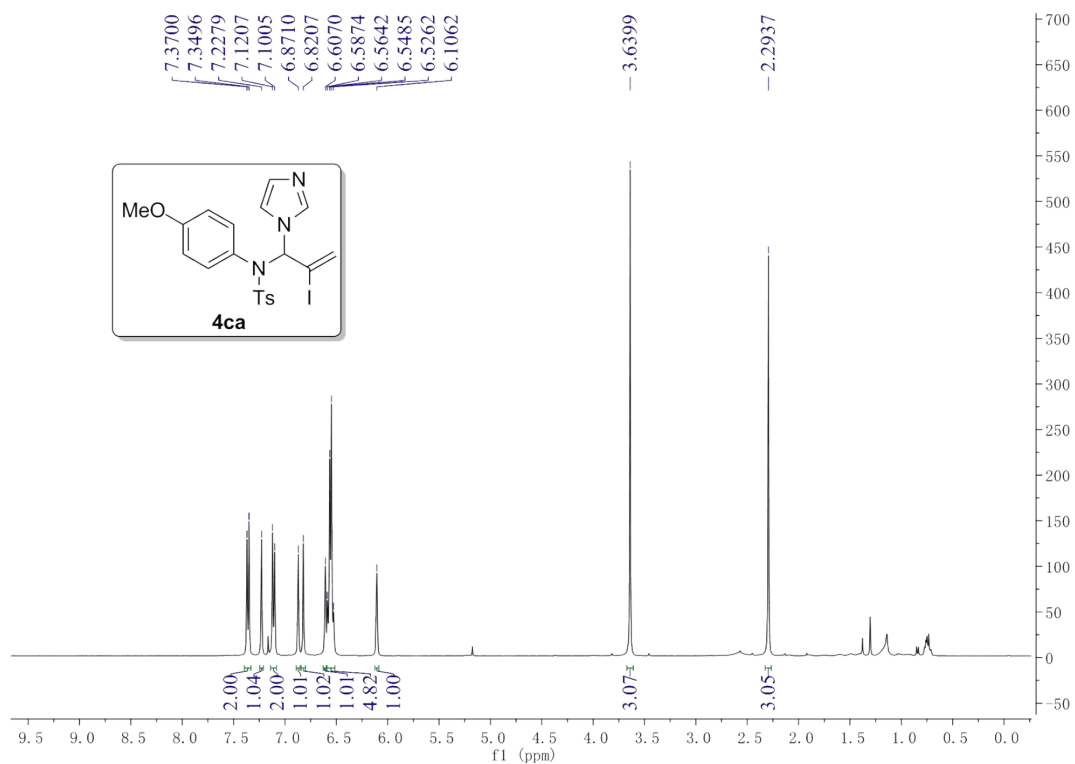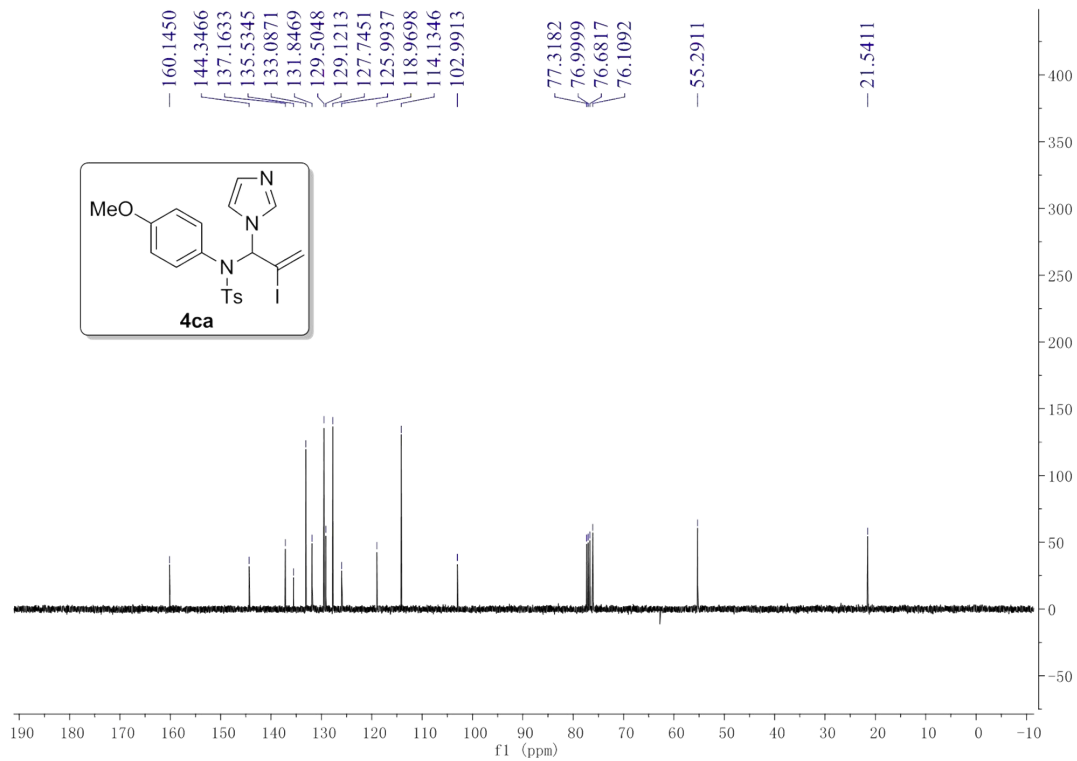

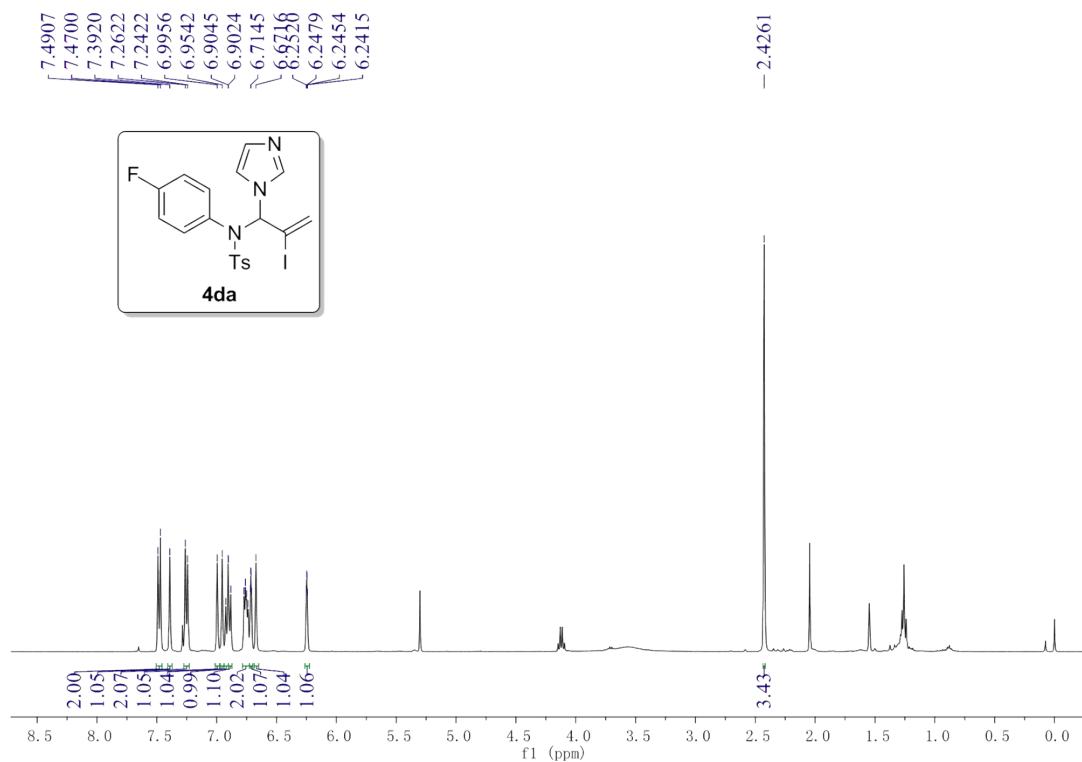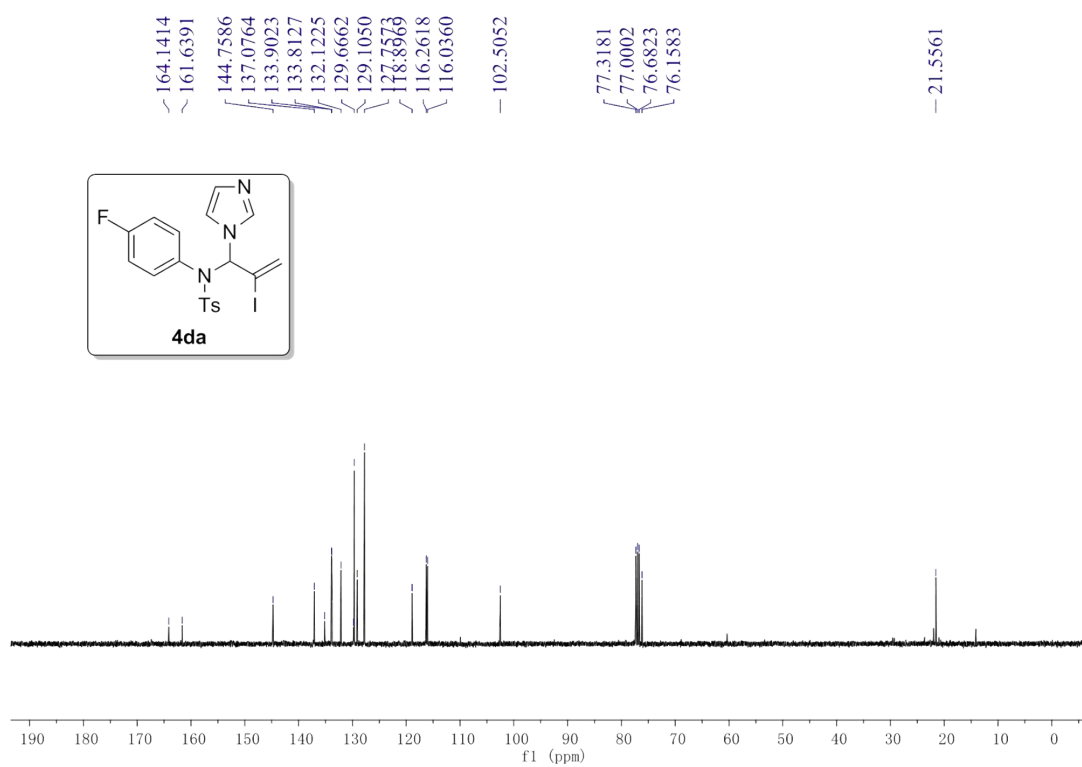

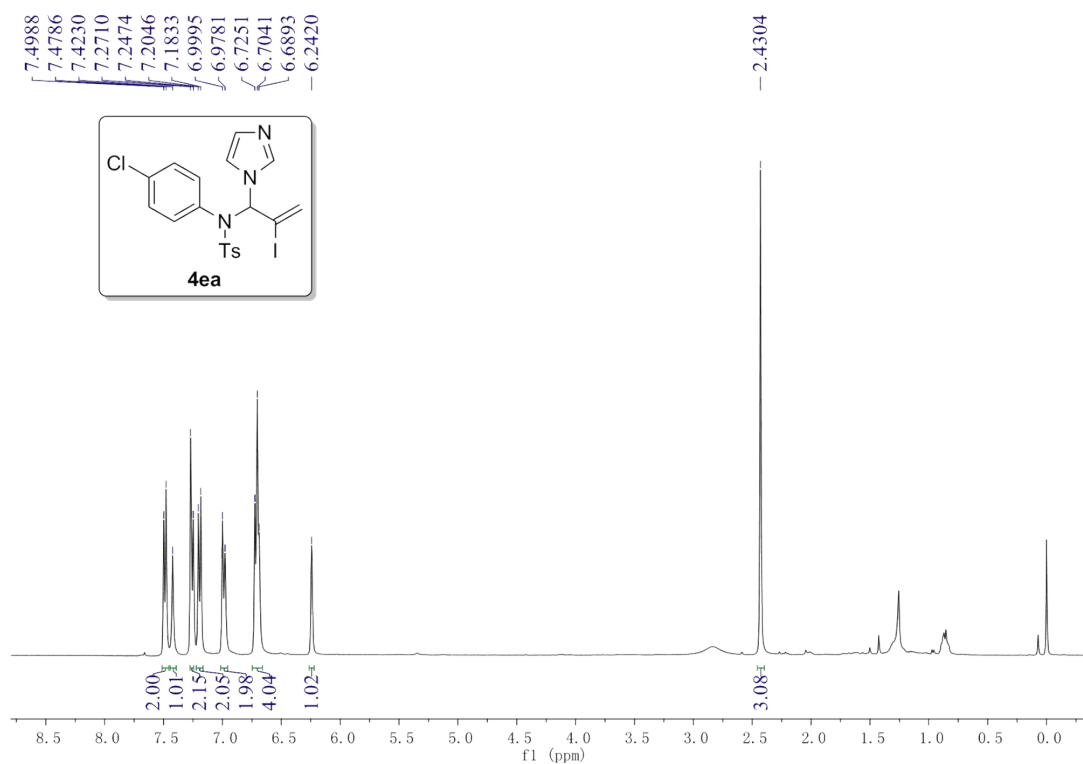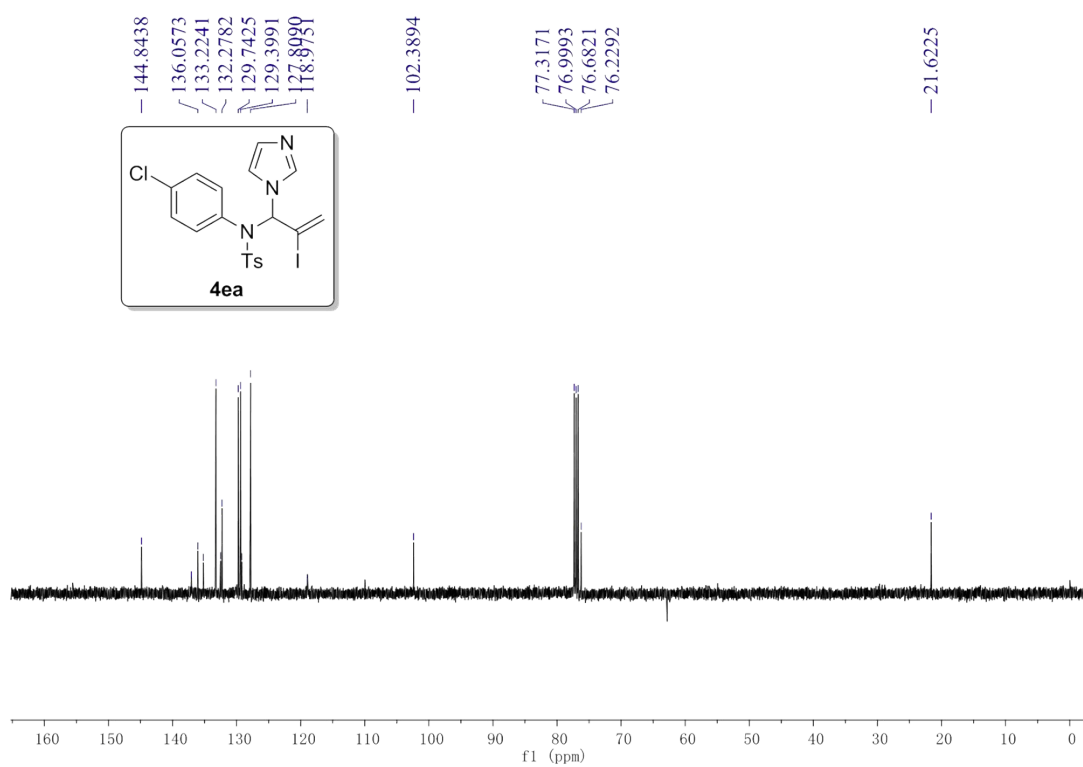

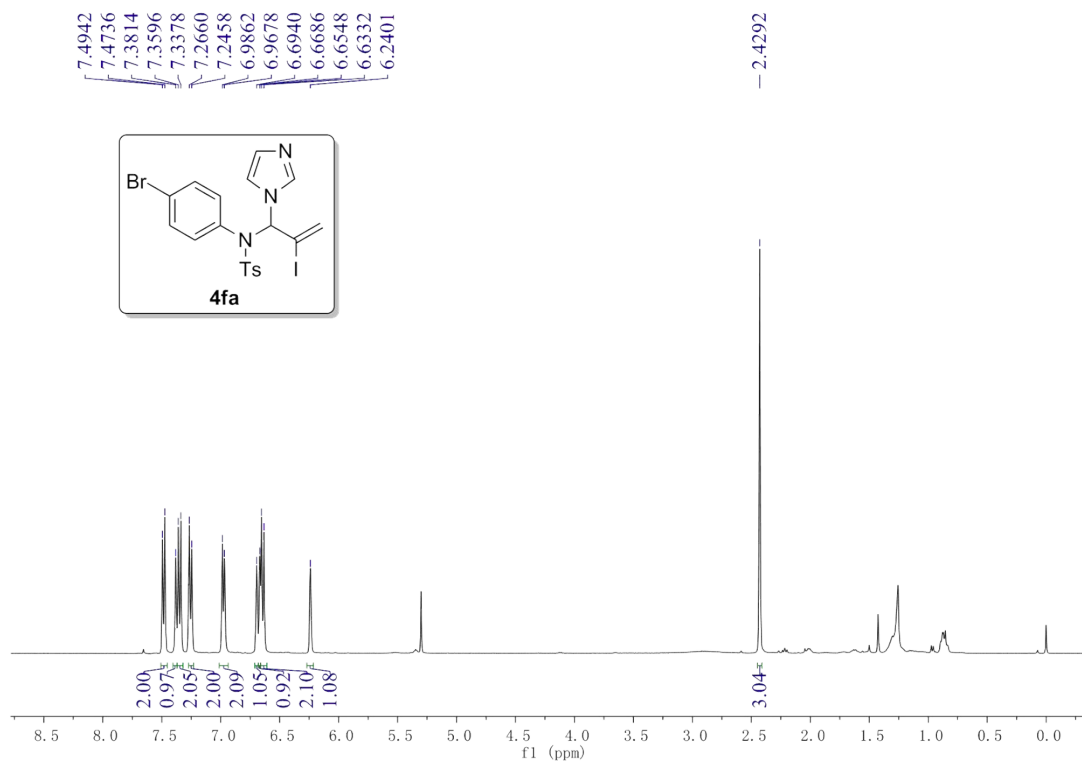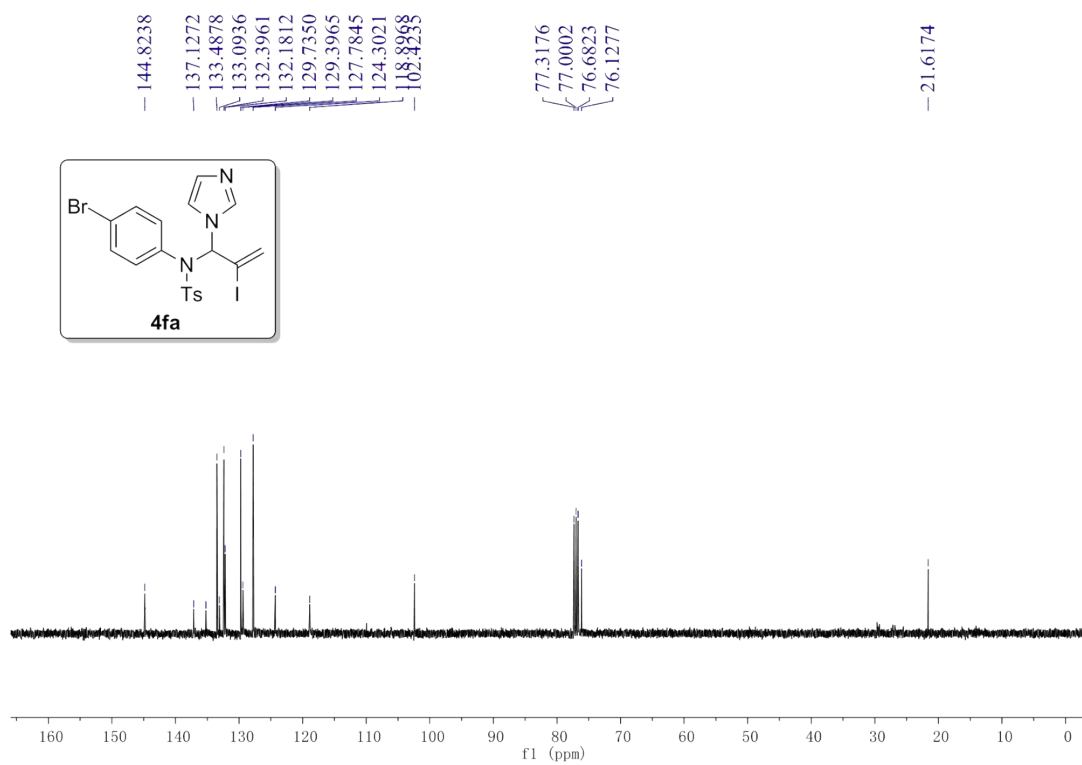

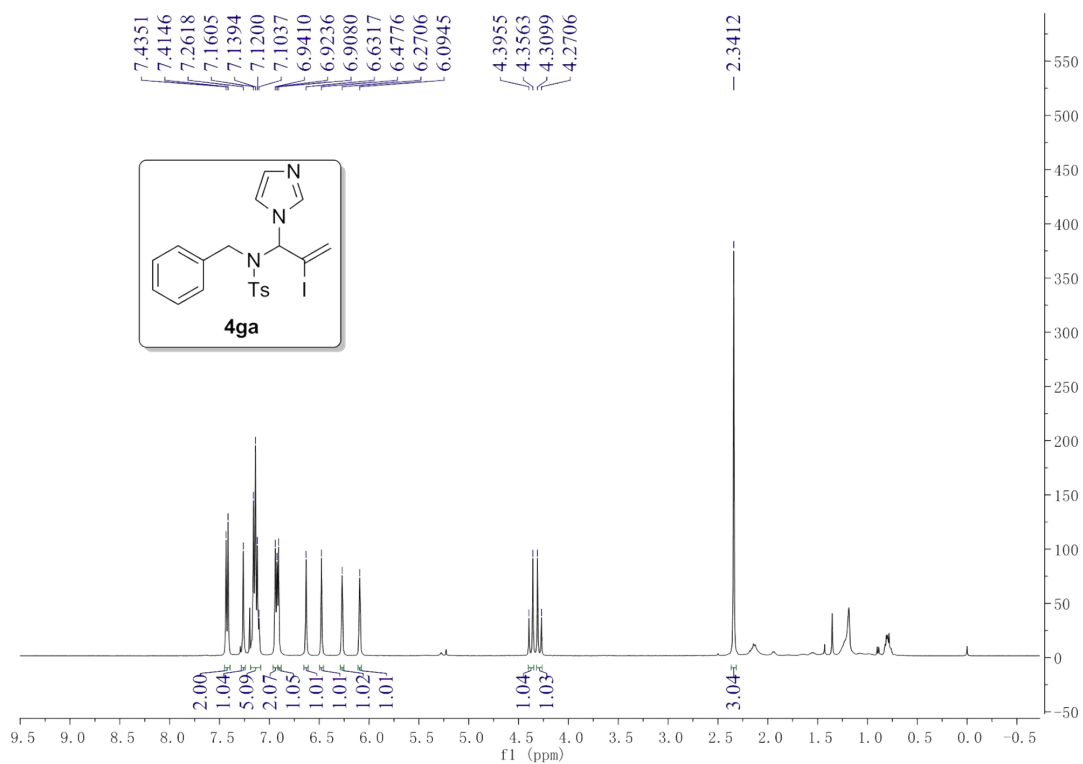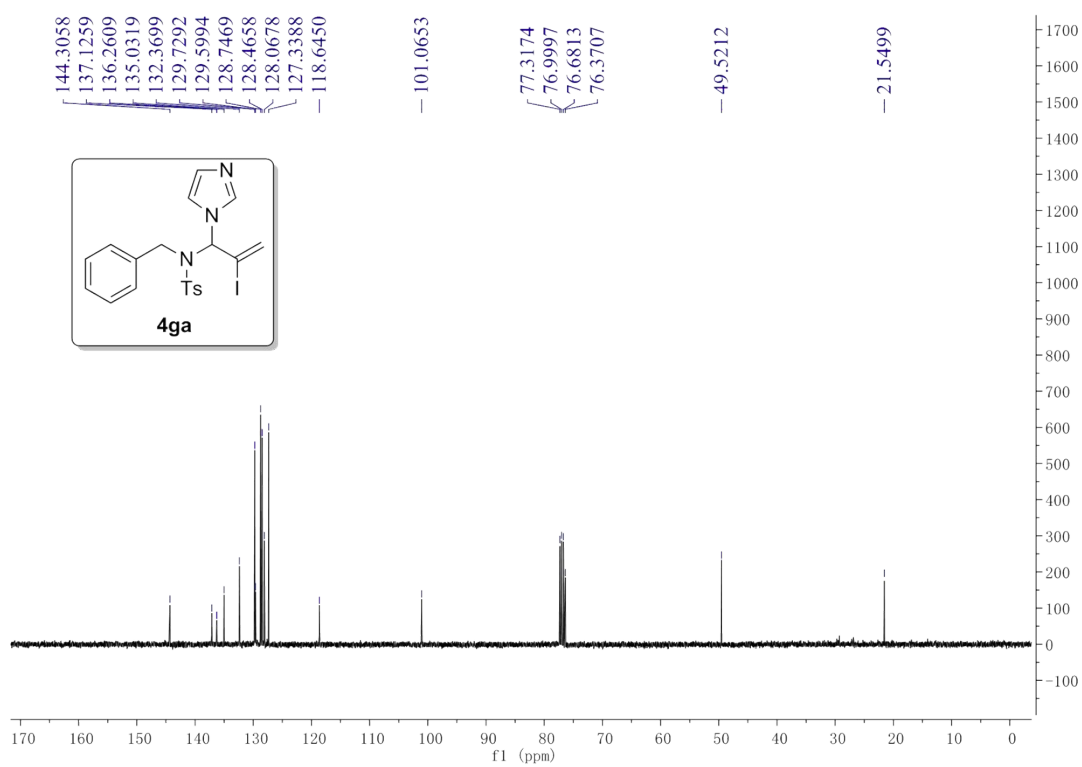

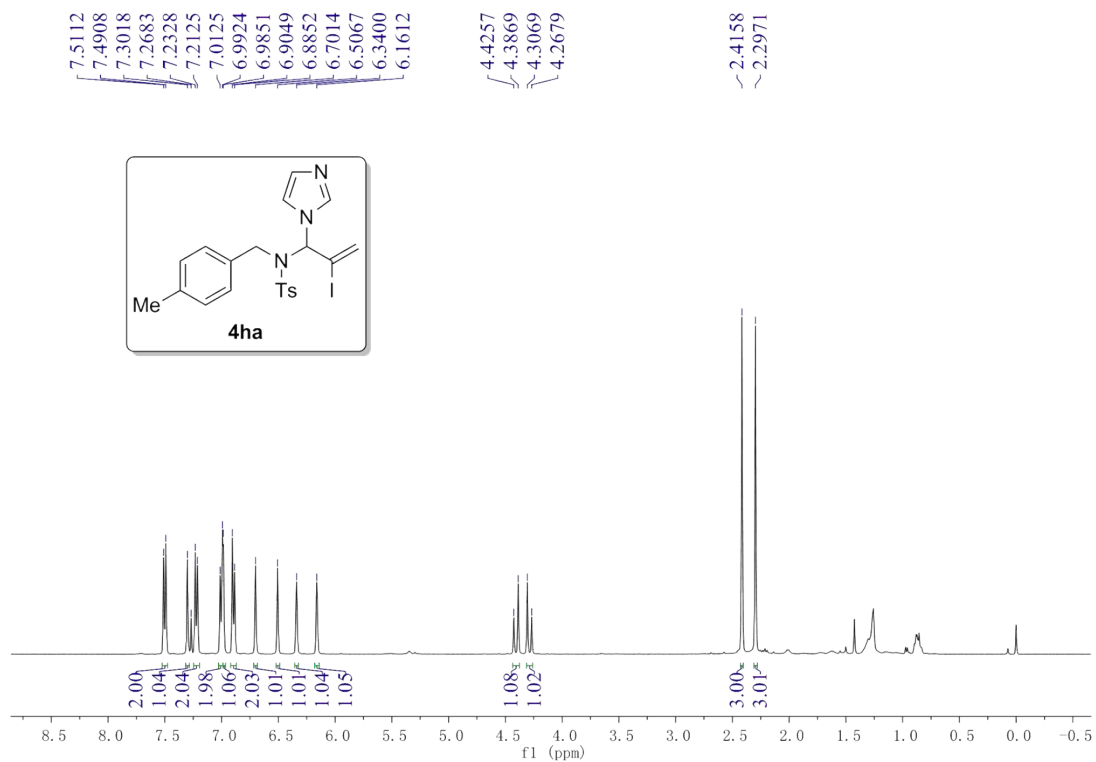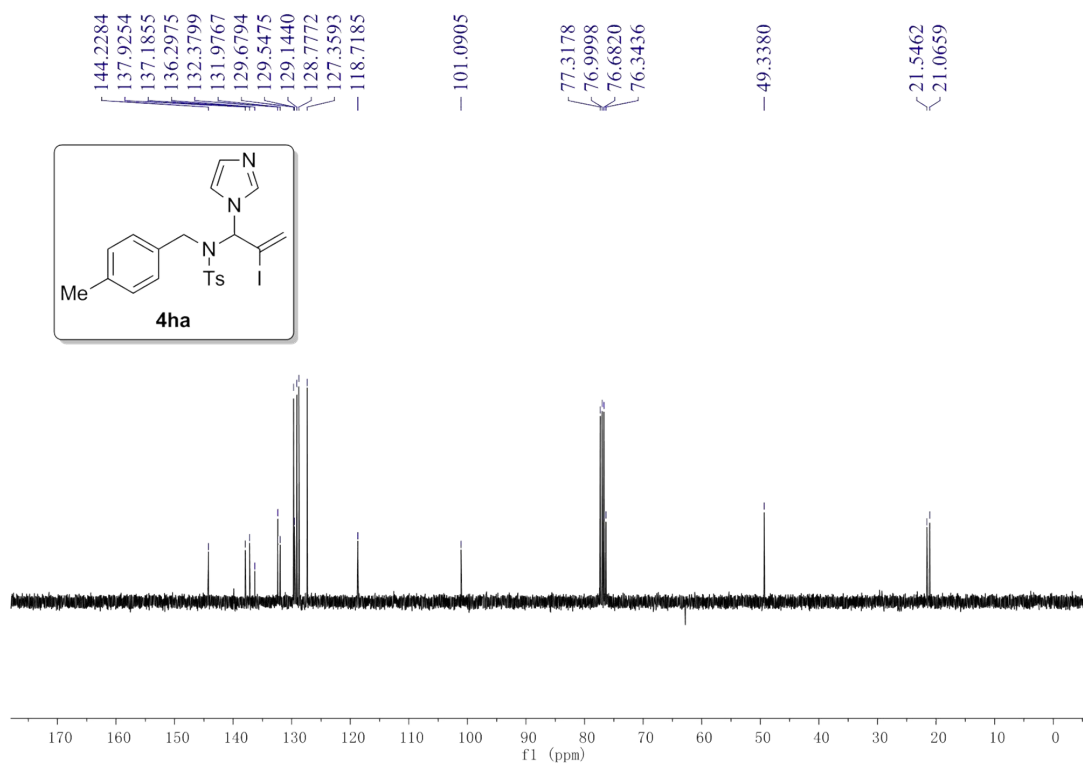



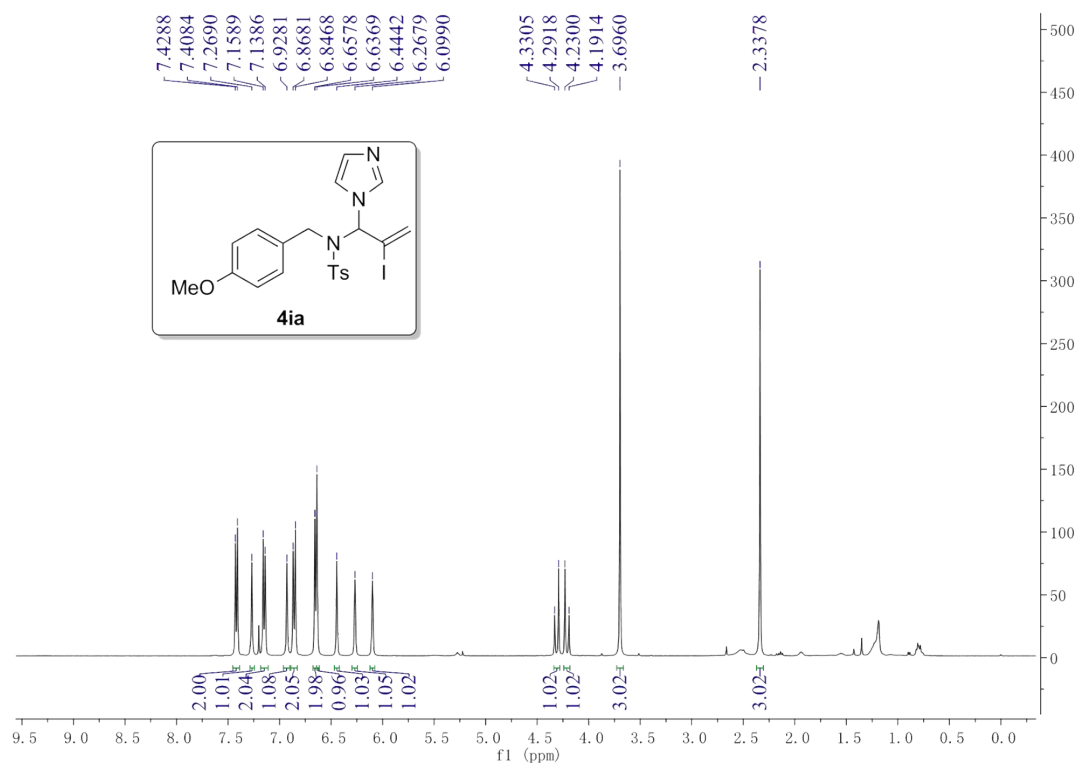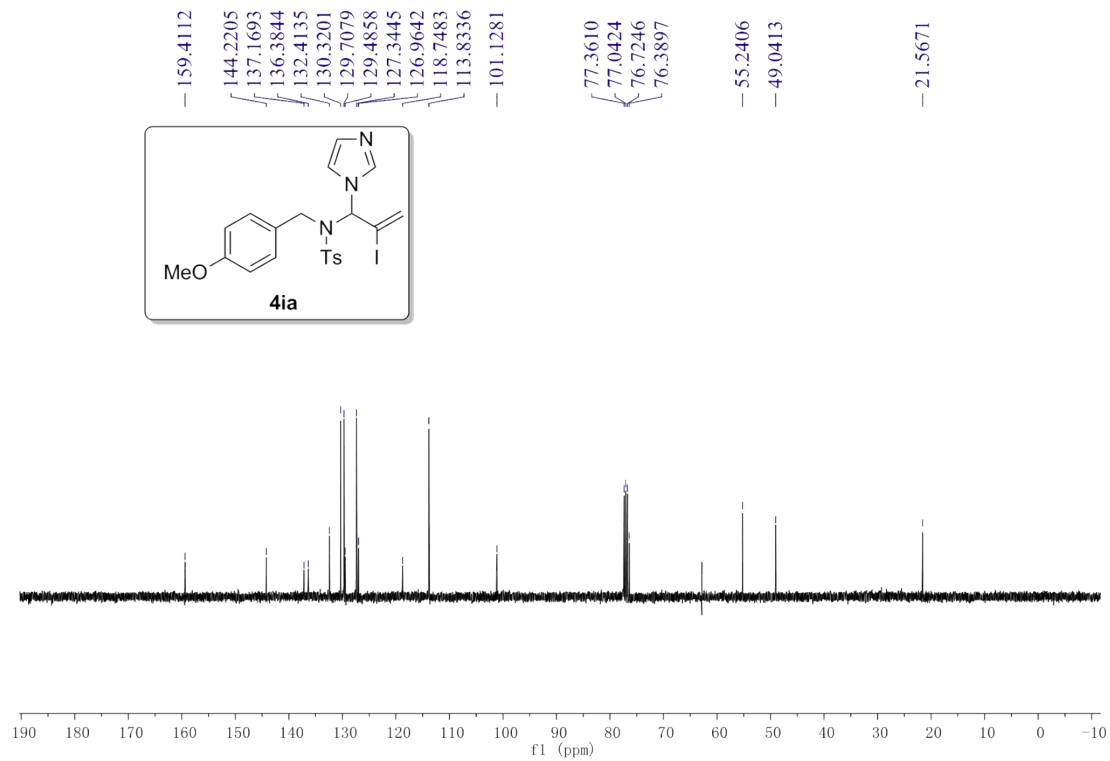

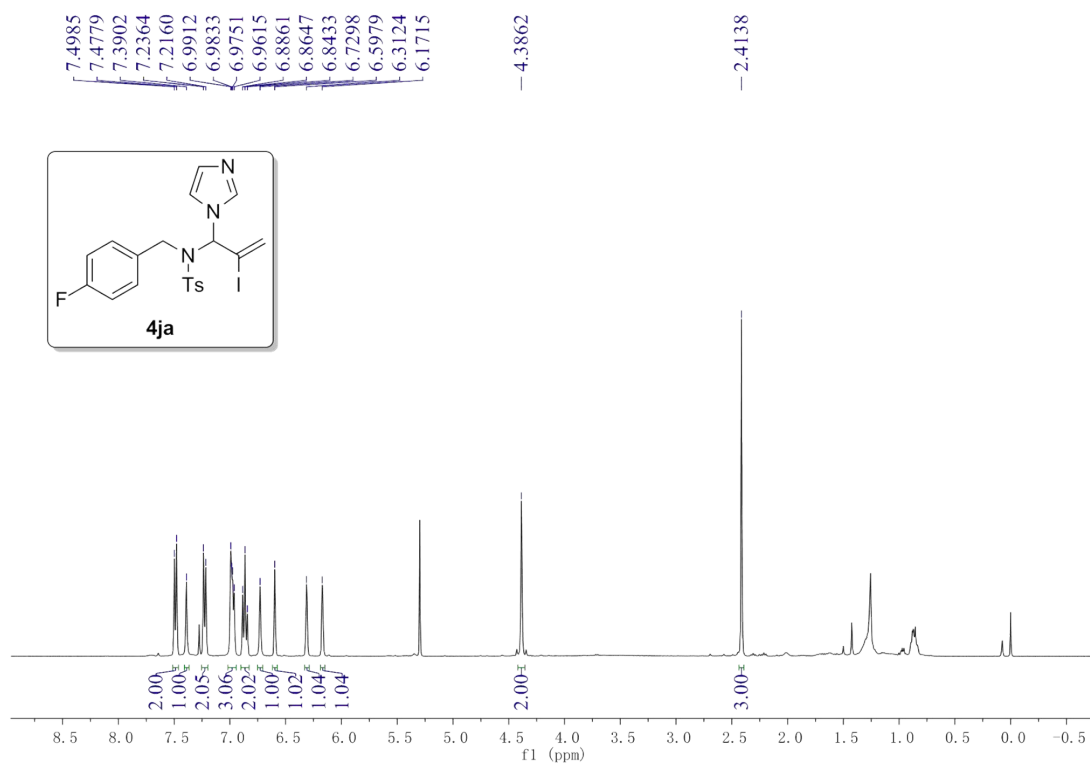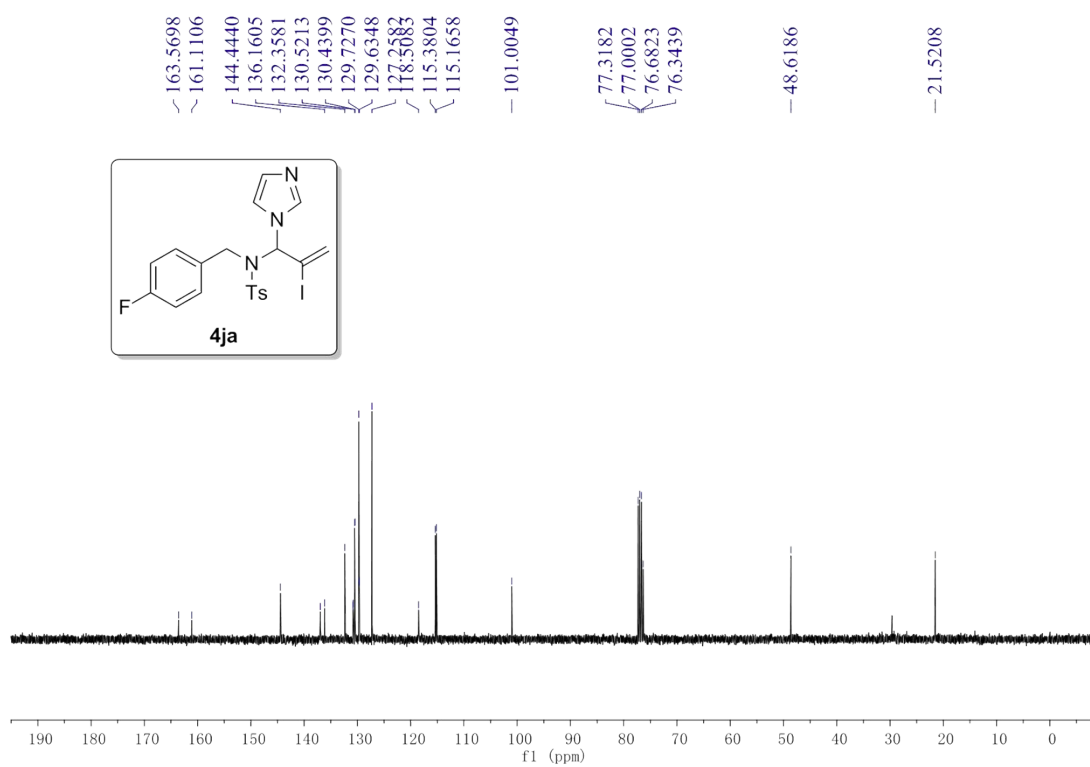

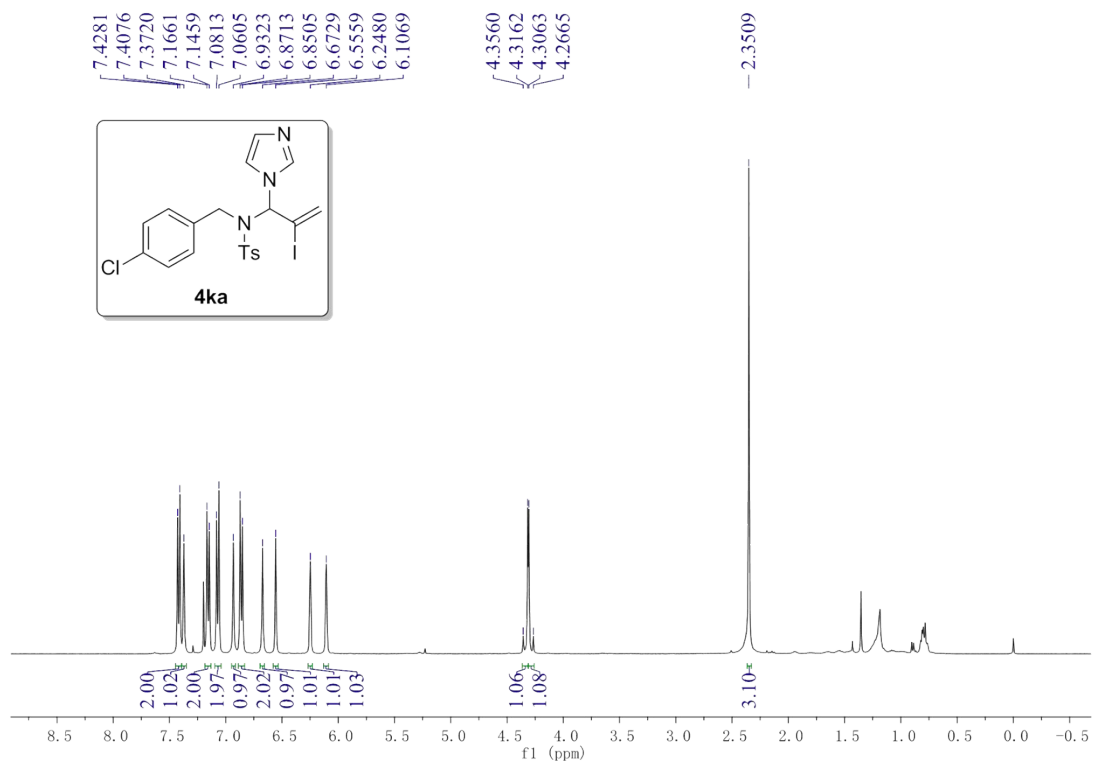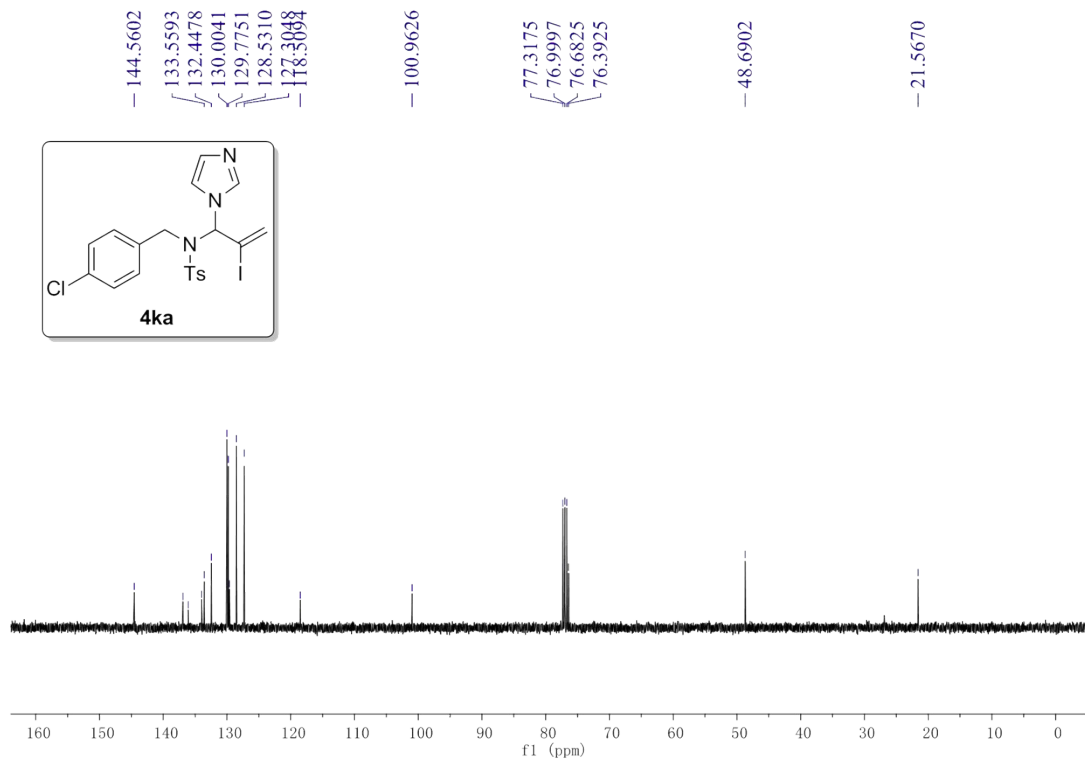

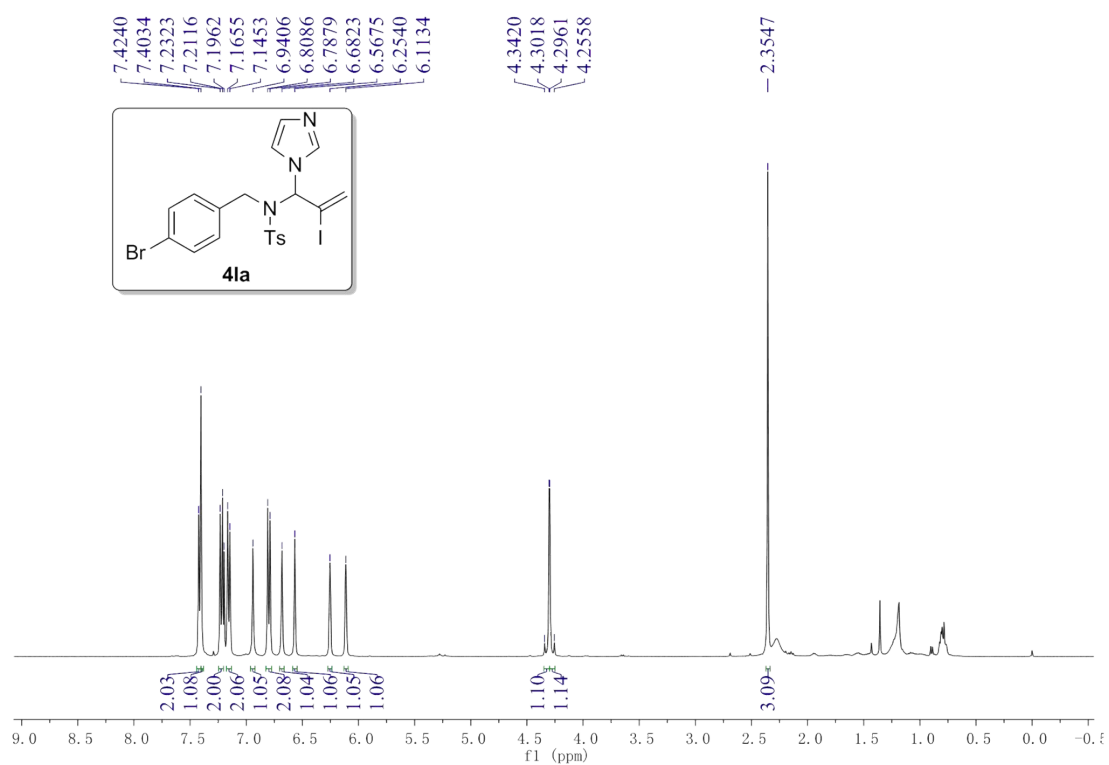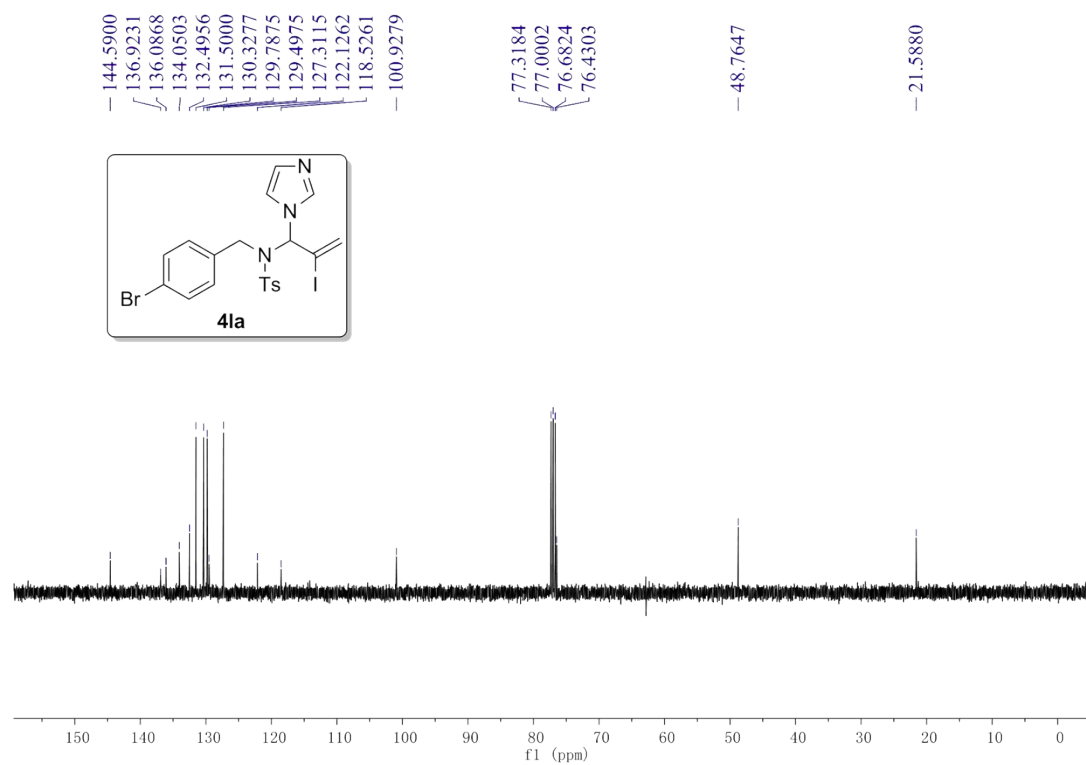

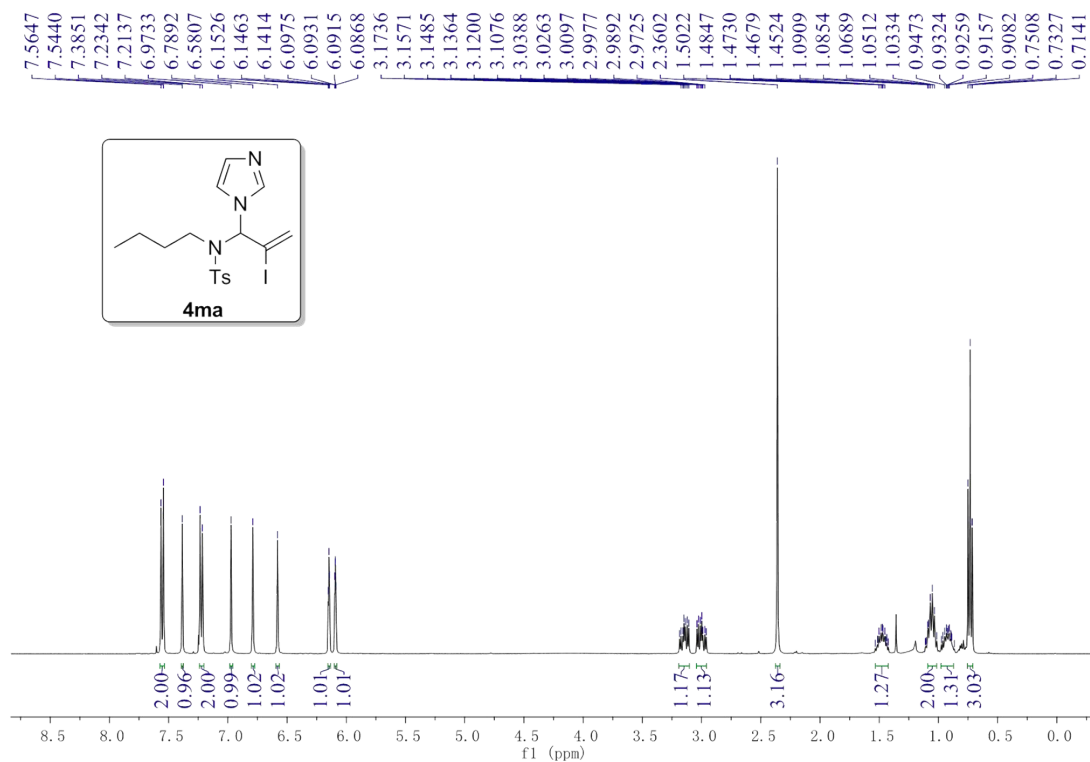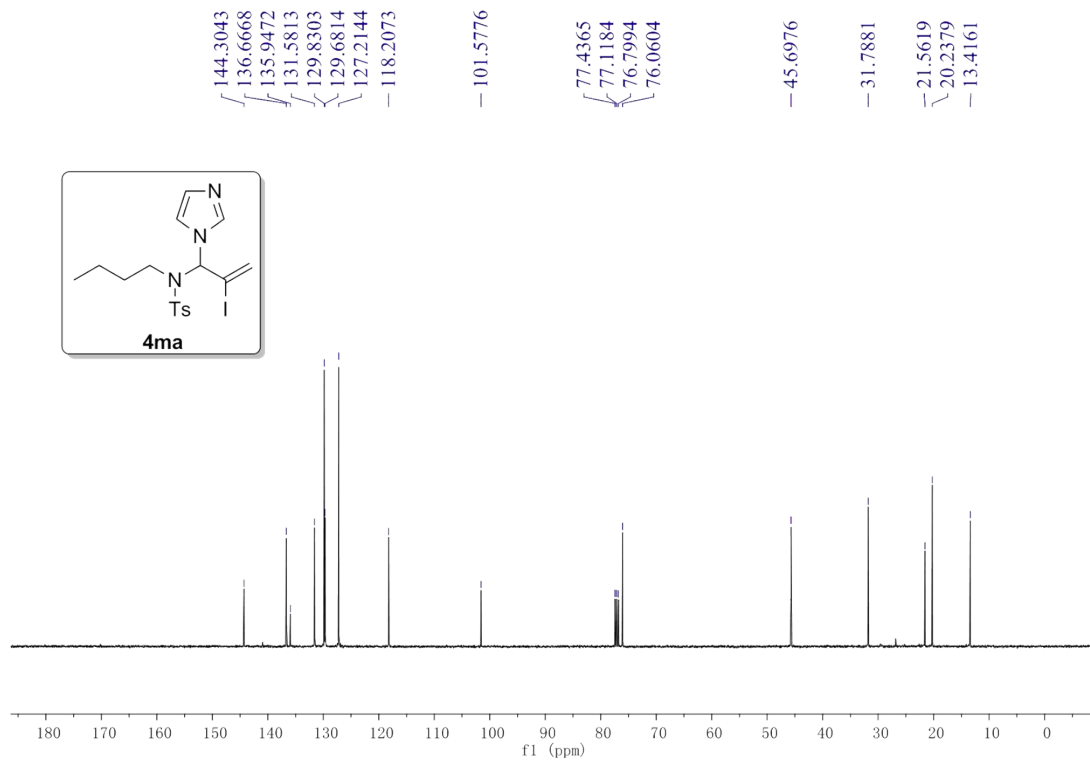

# <sup>1</sup>H and <sup>13</sup>C NMR spectra of 4ab-4al

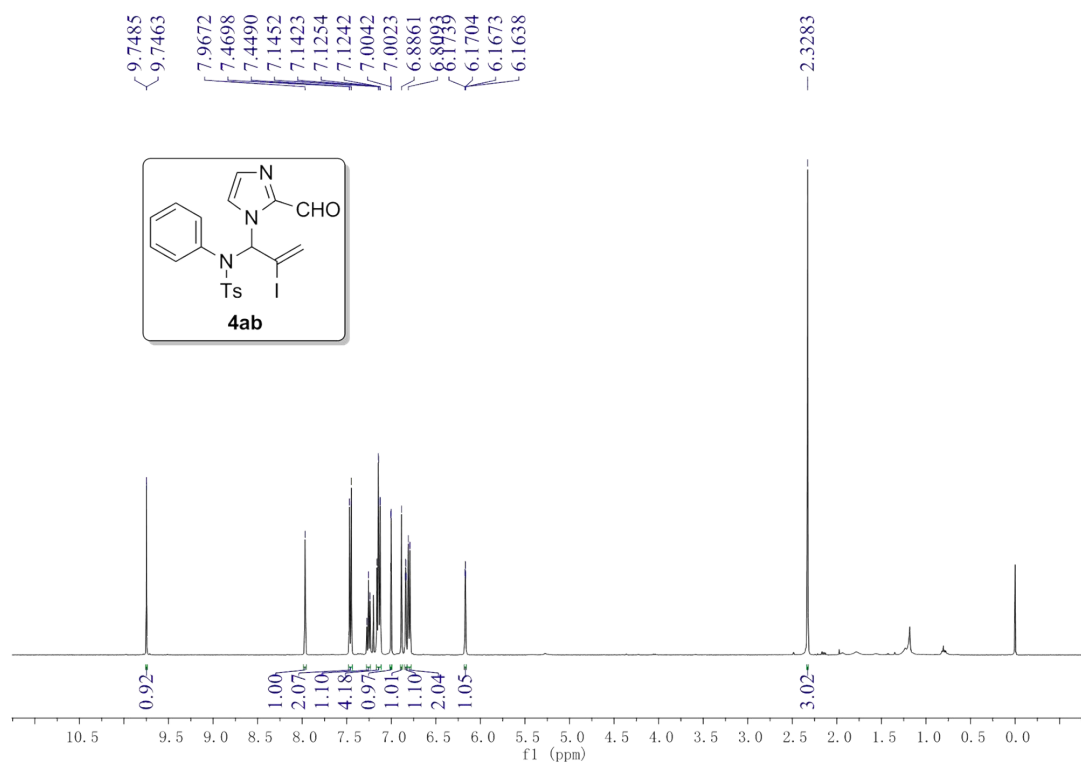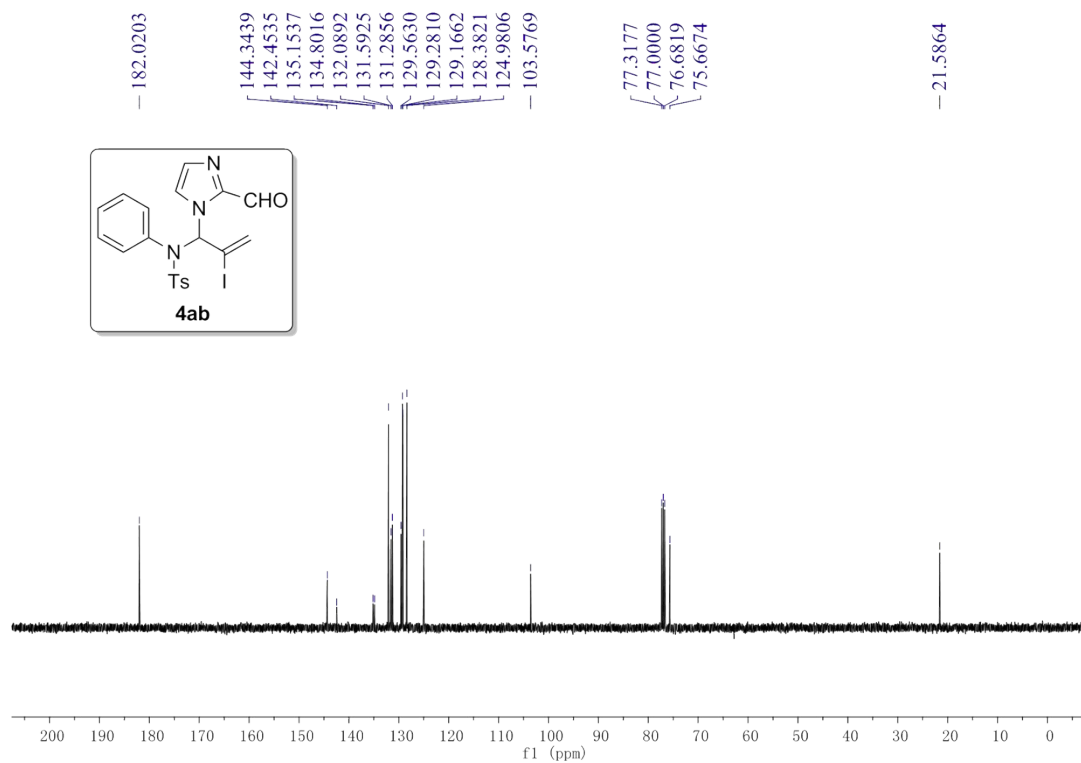

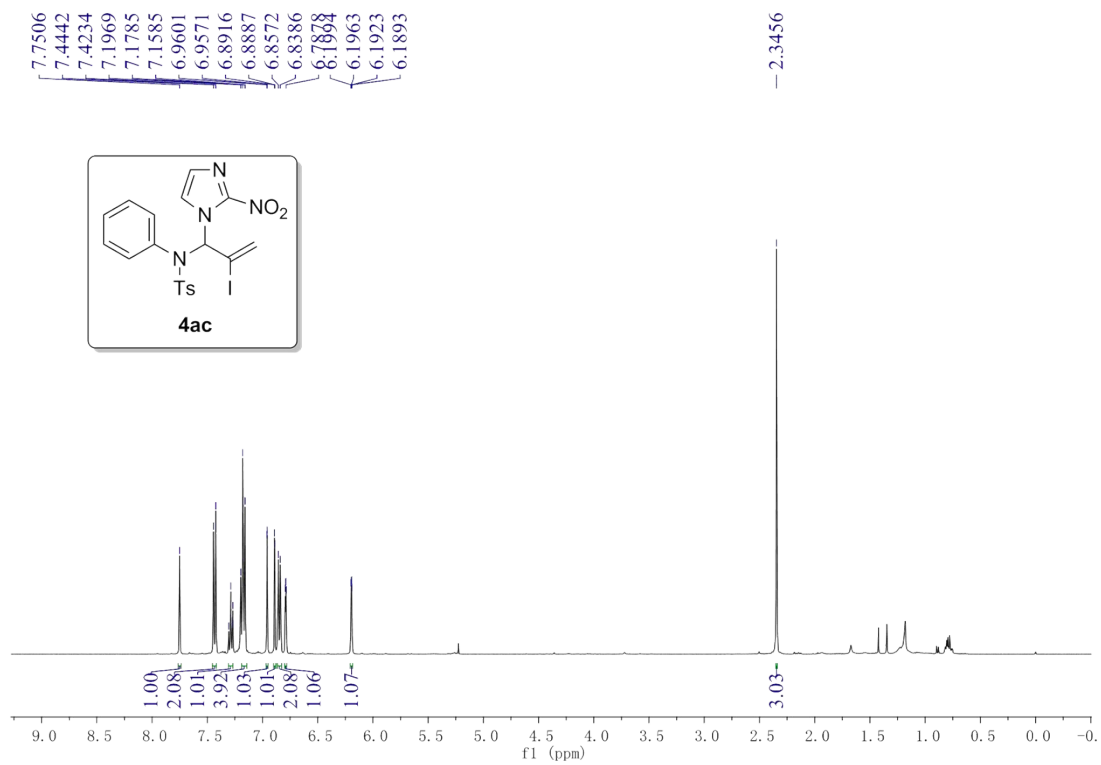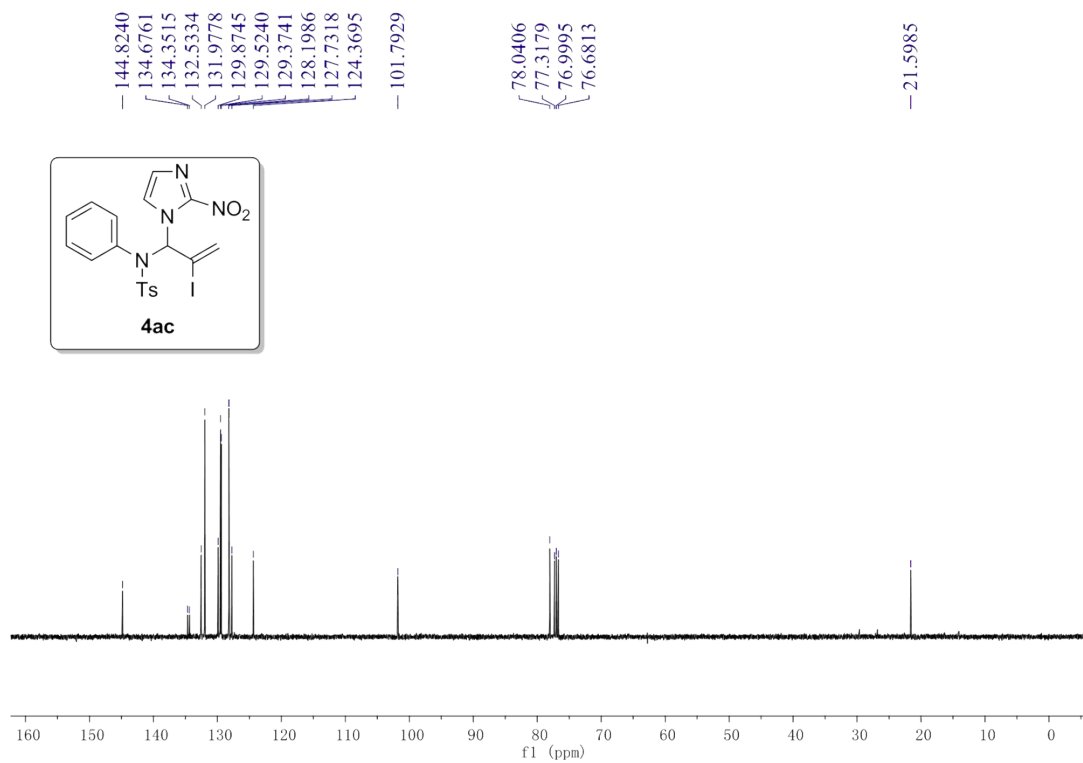

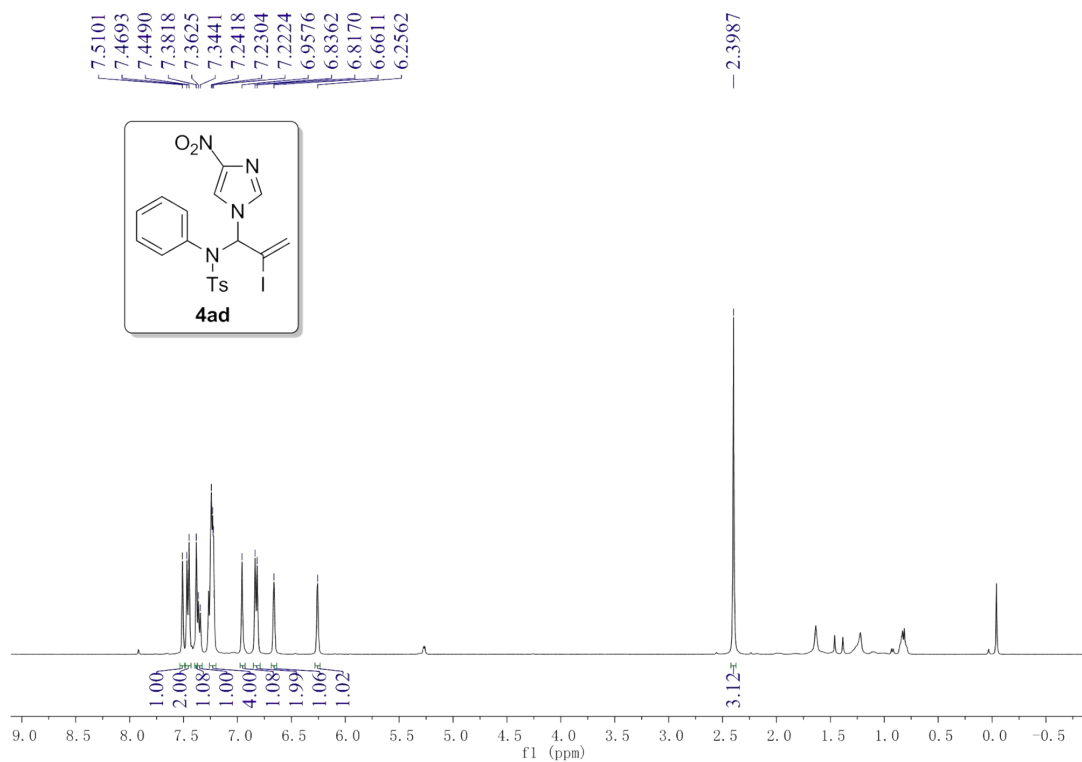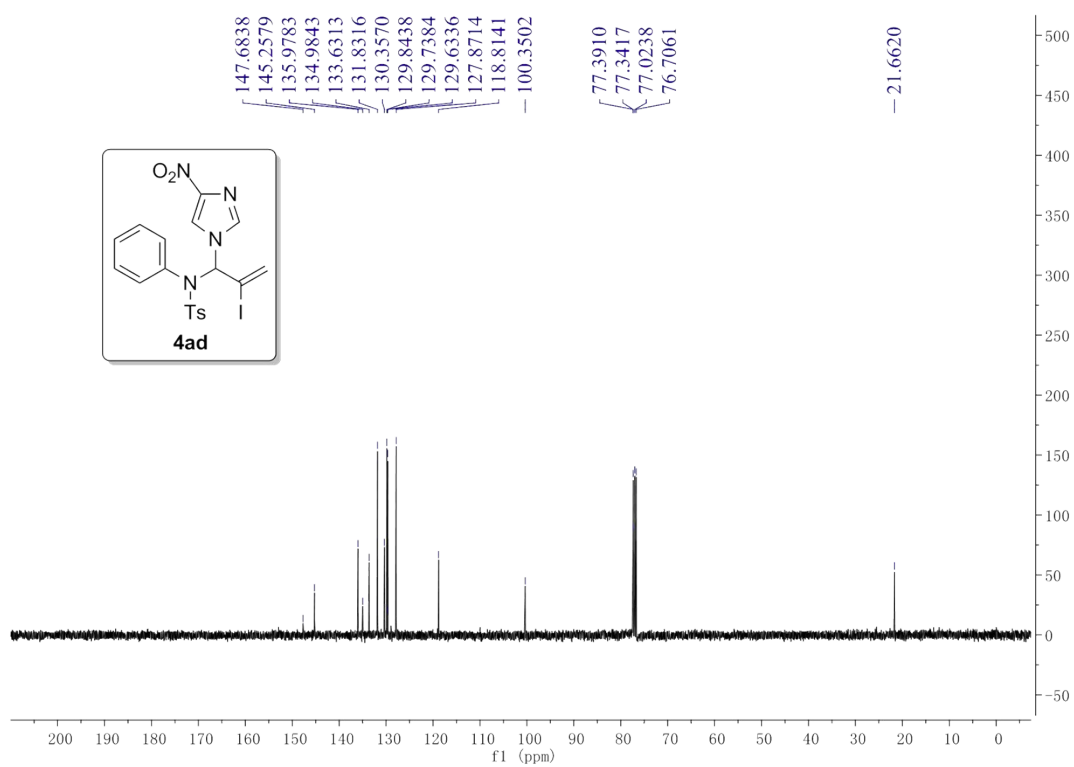



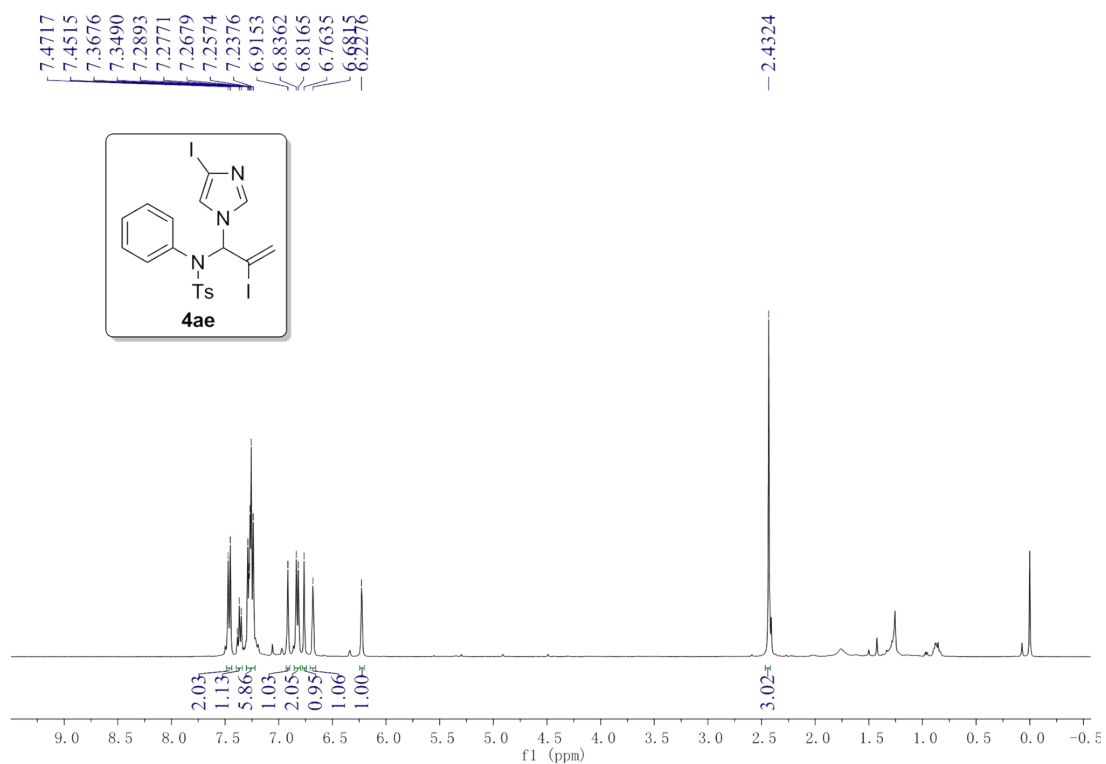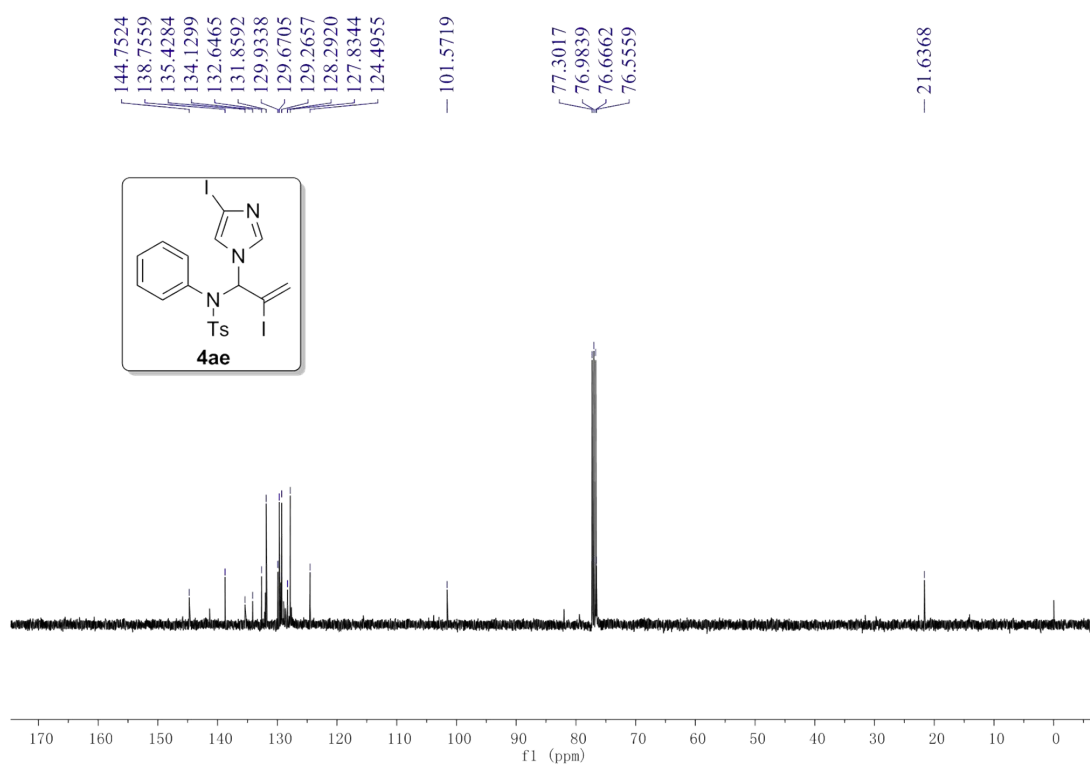

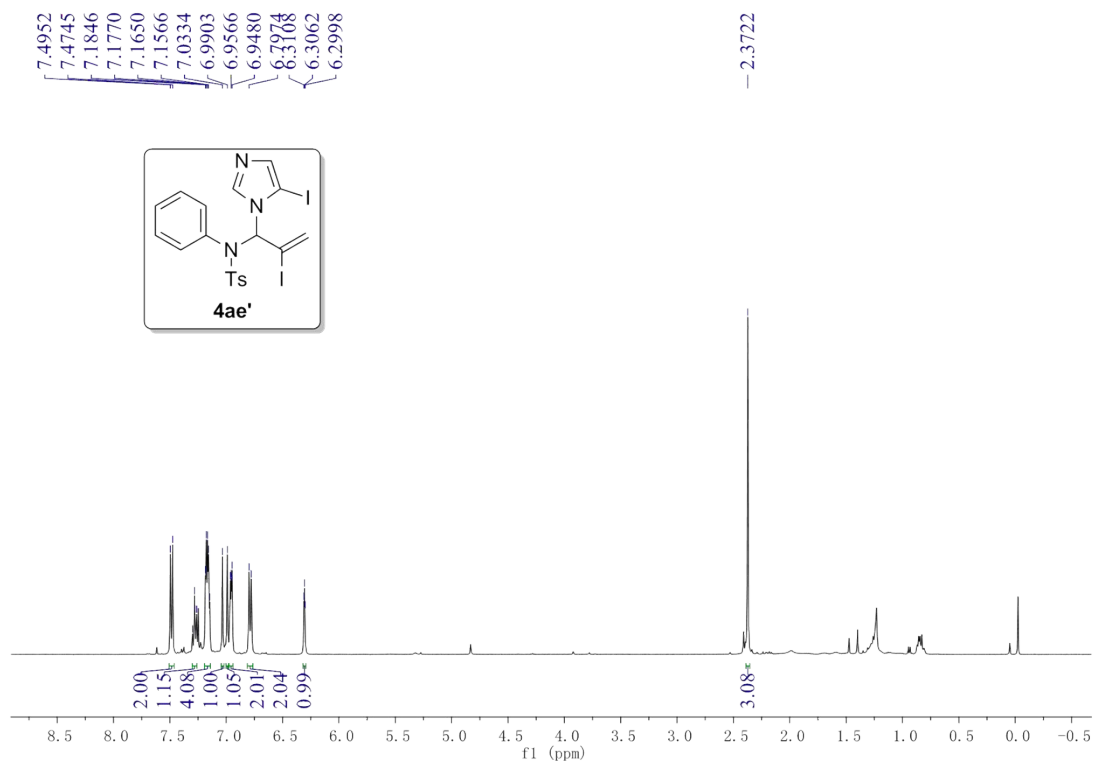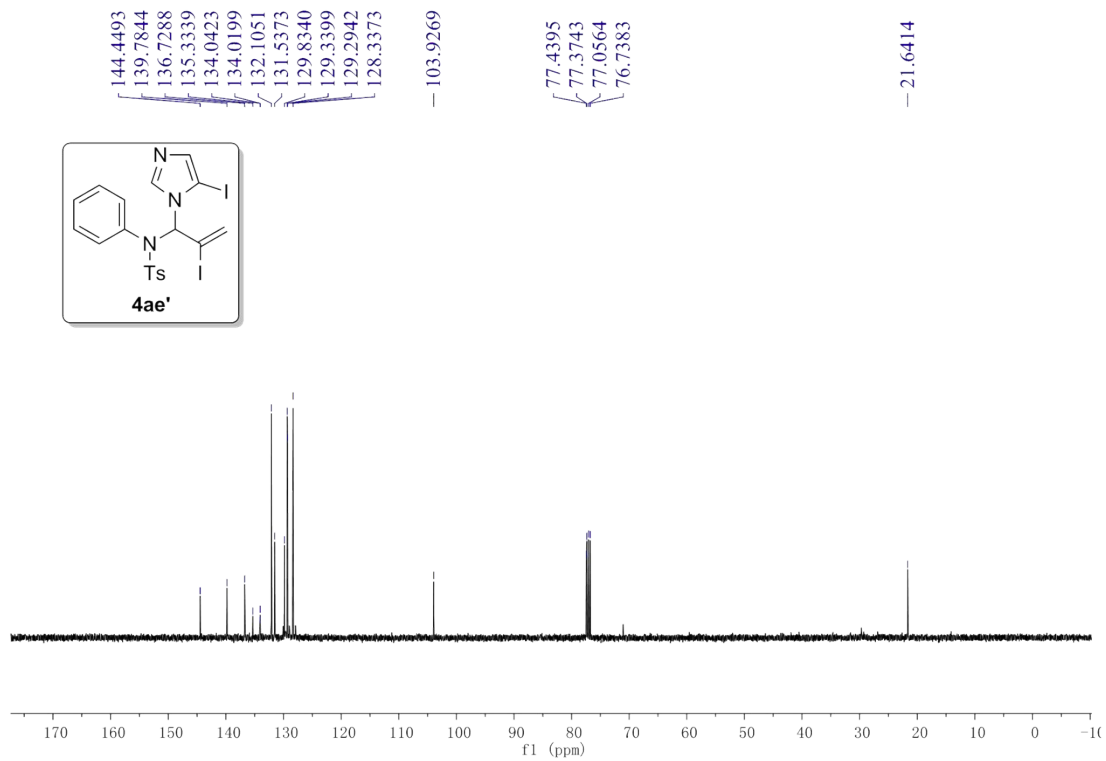

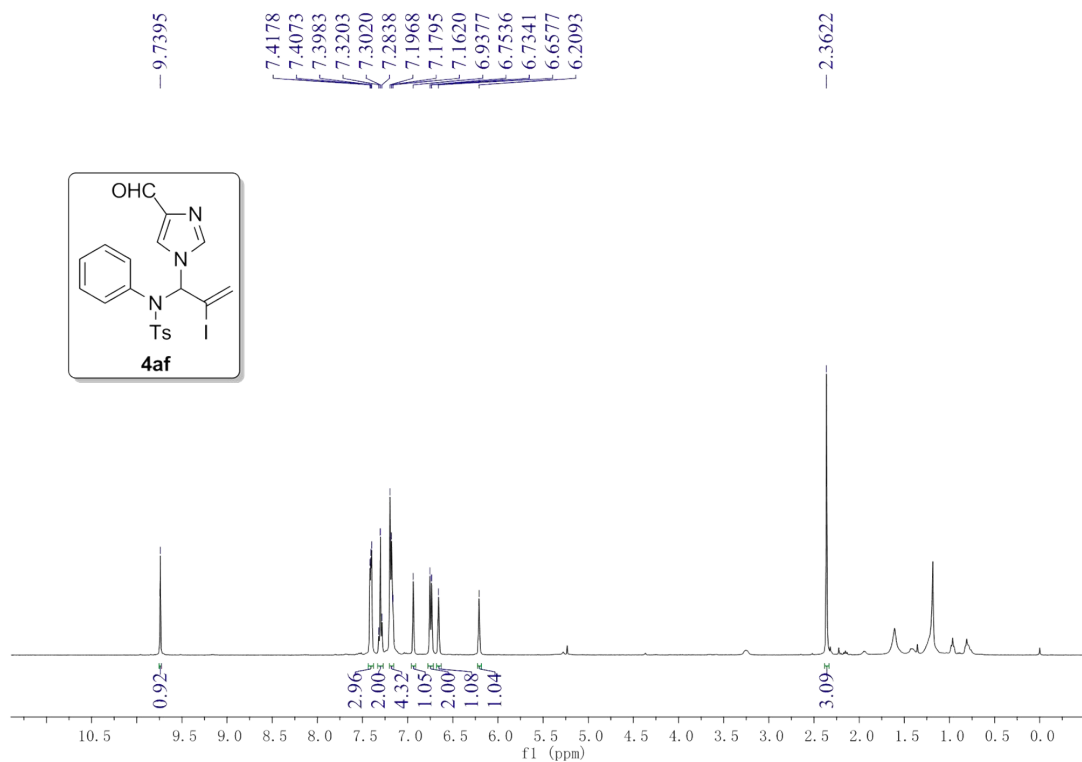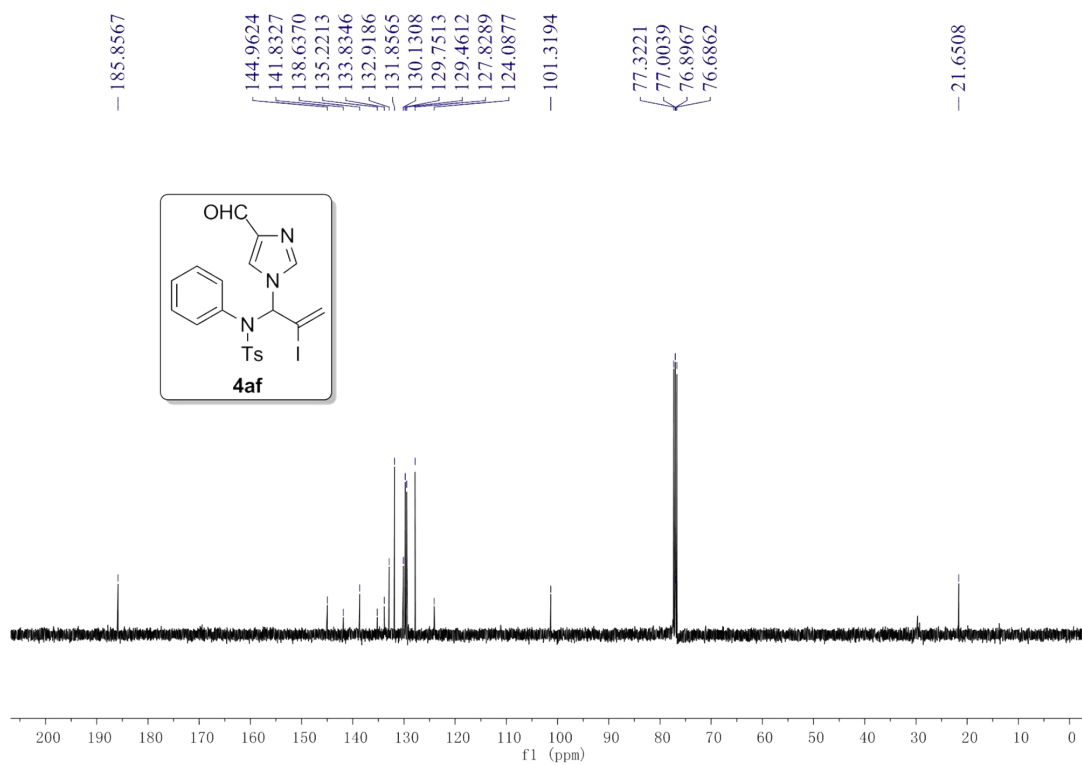

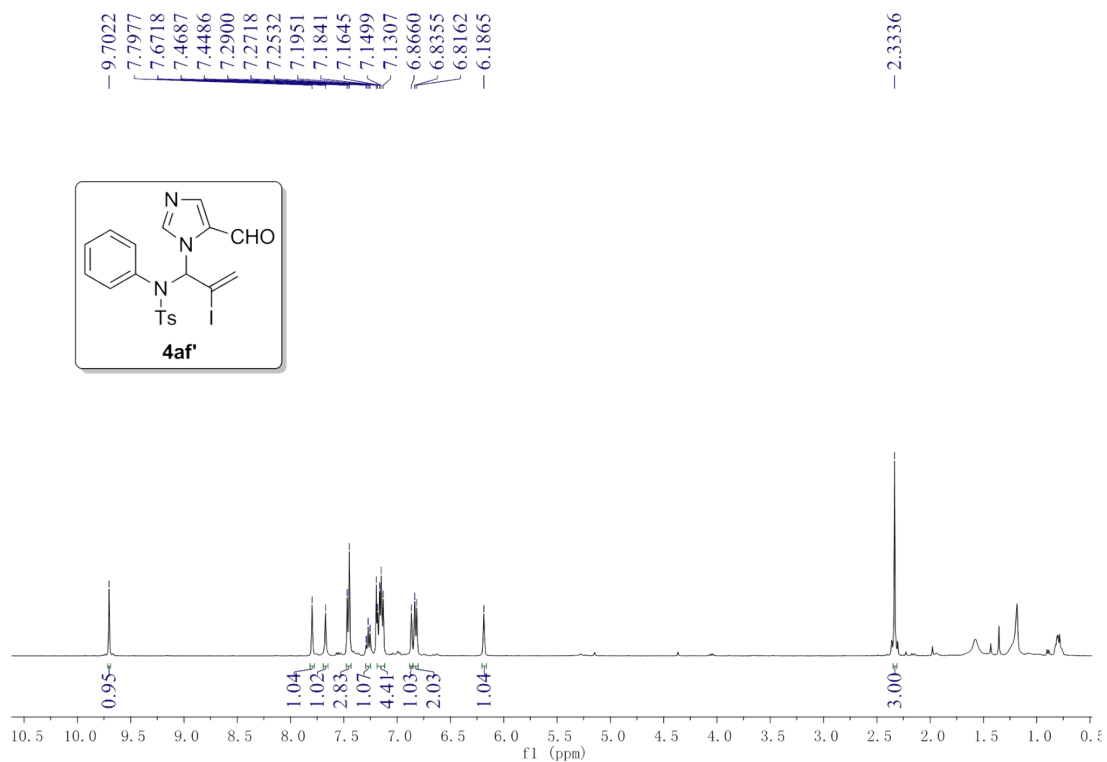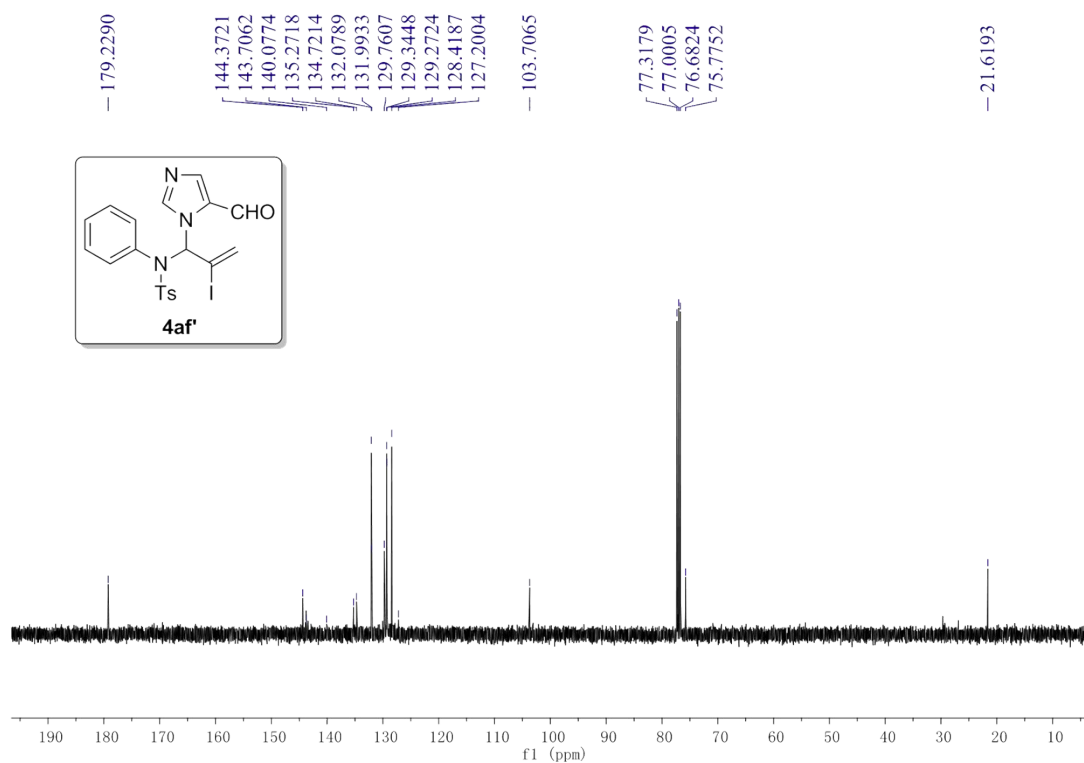

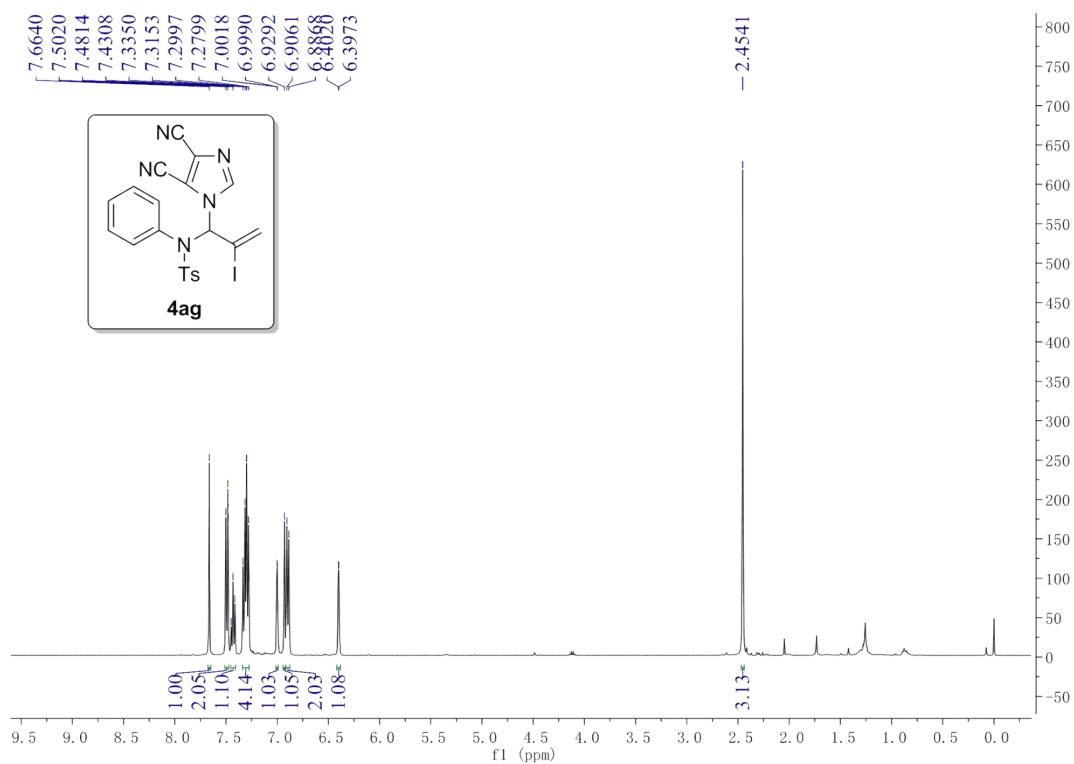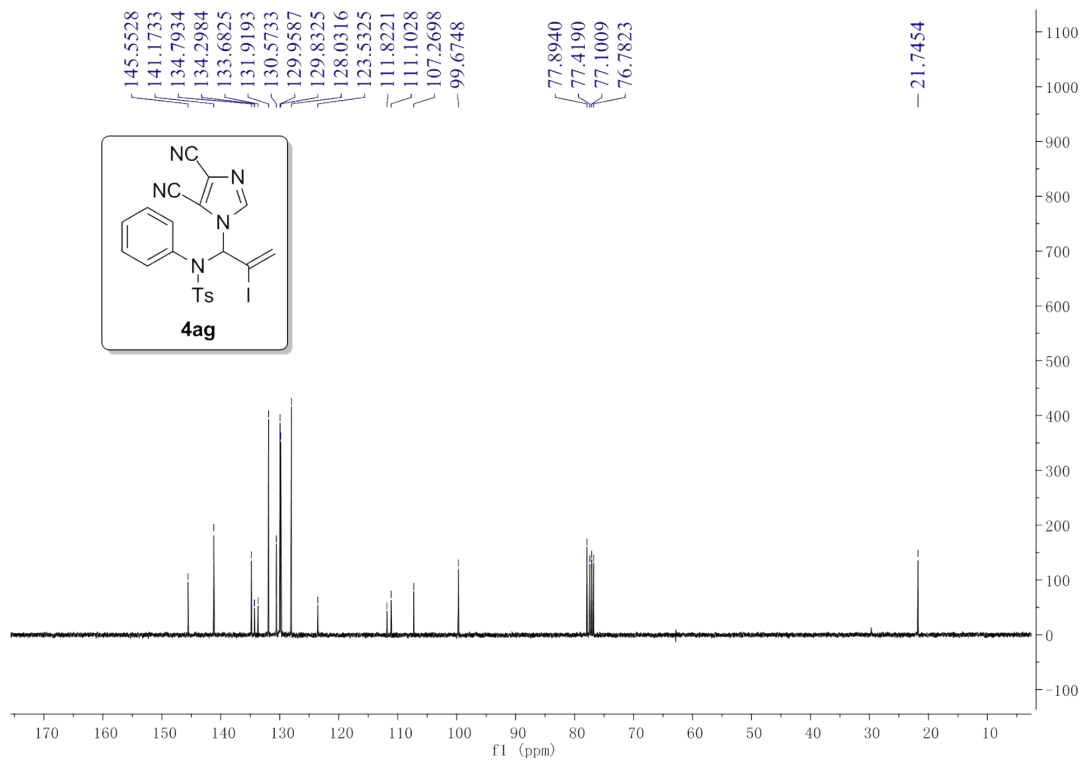

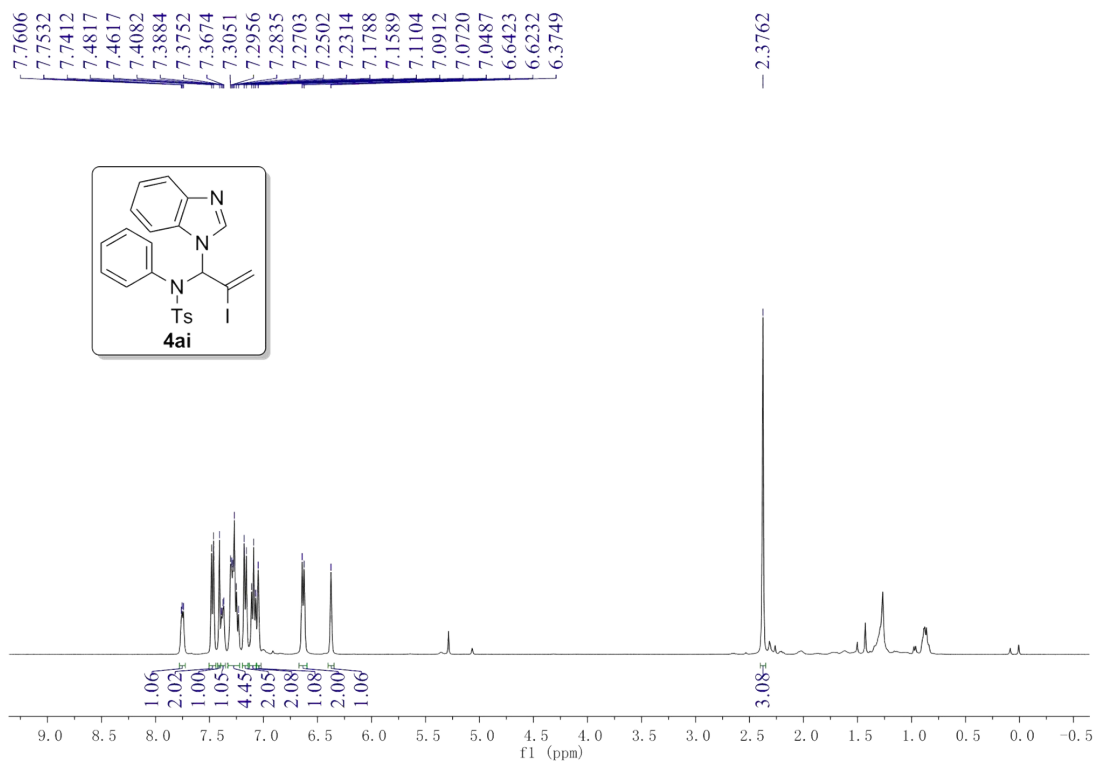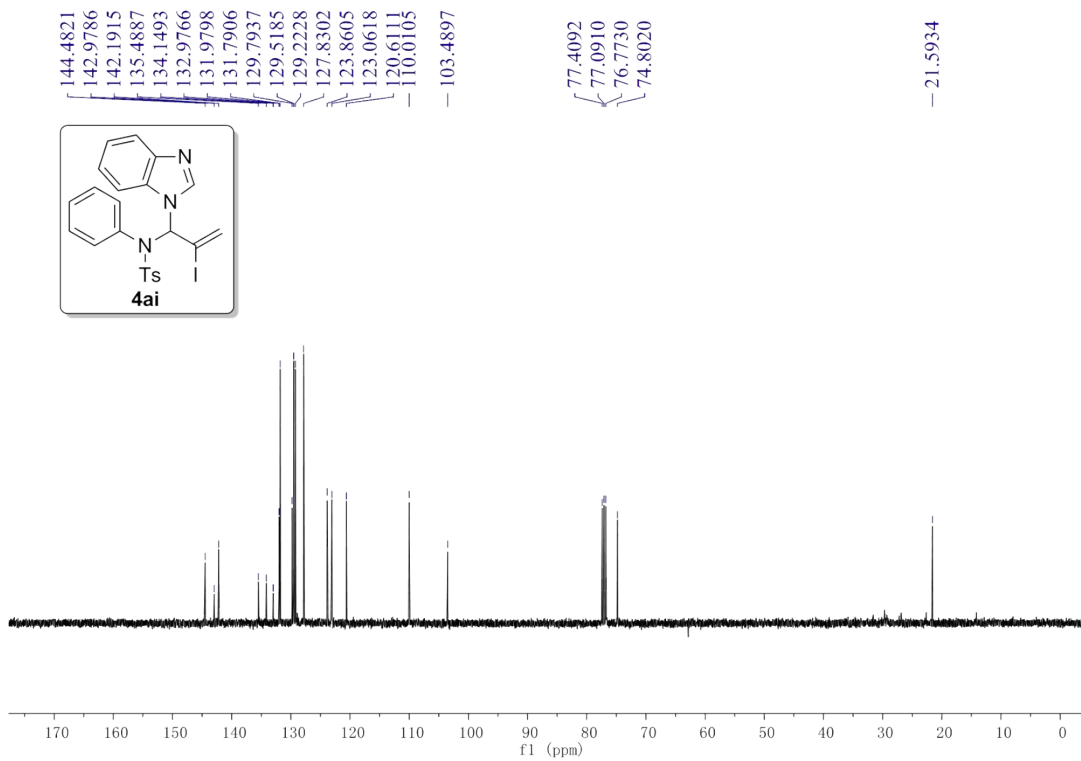

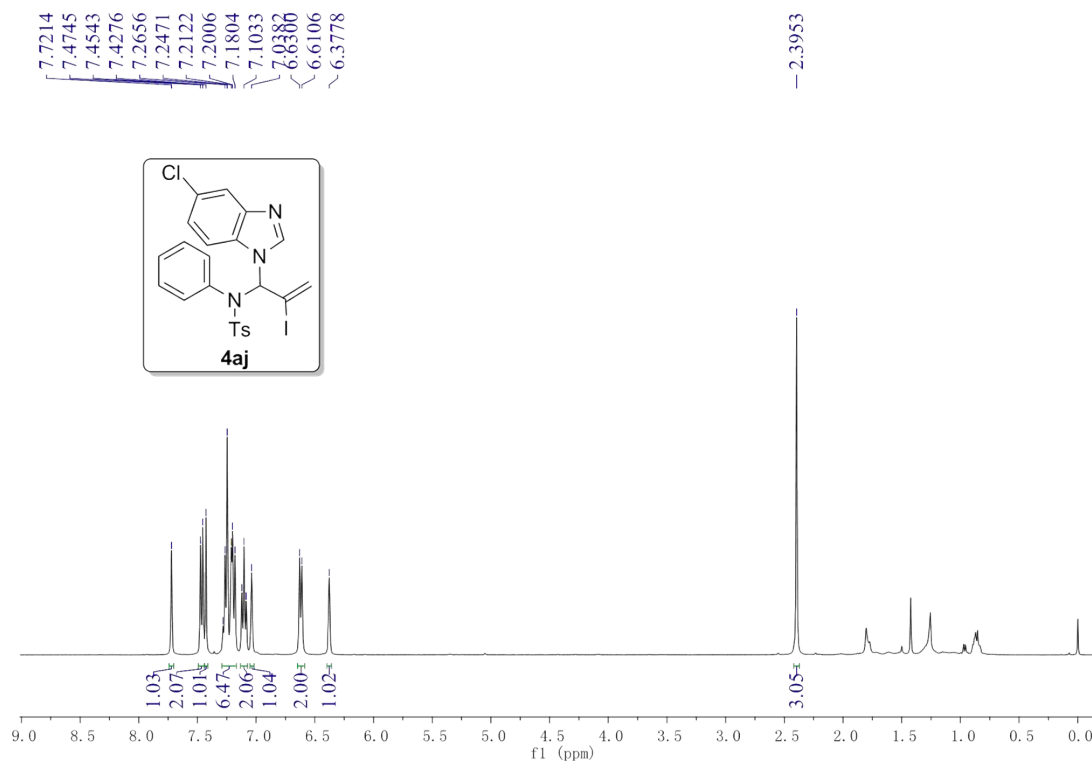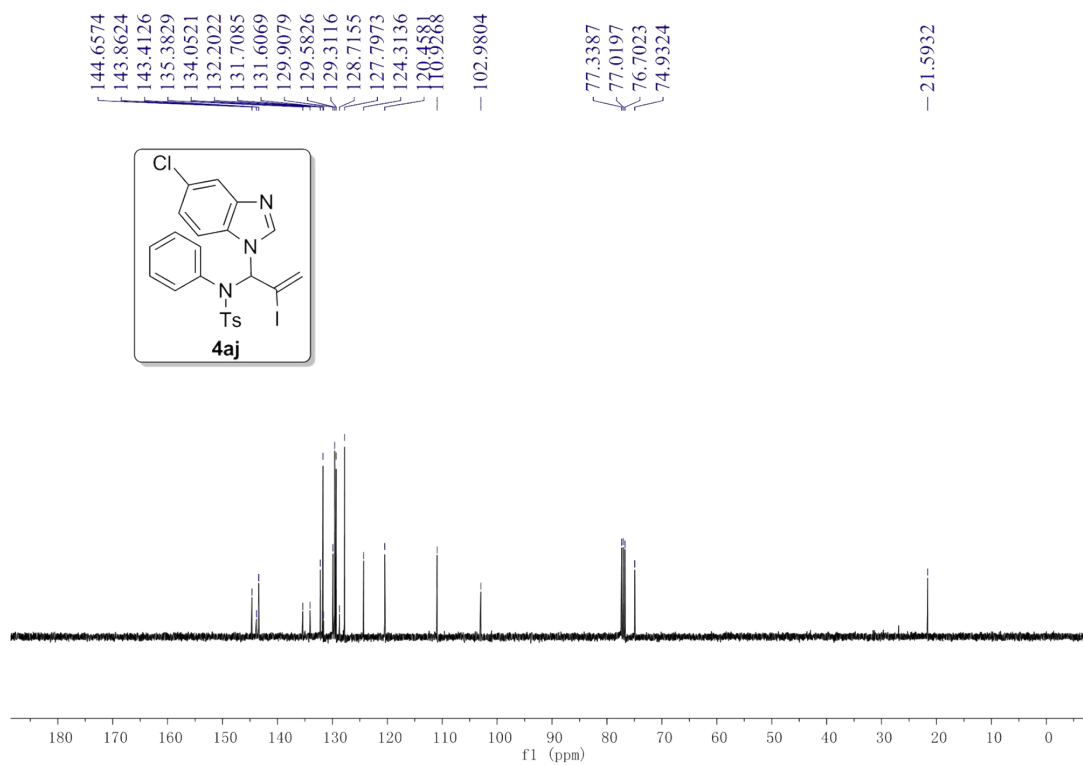

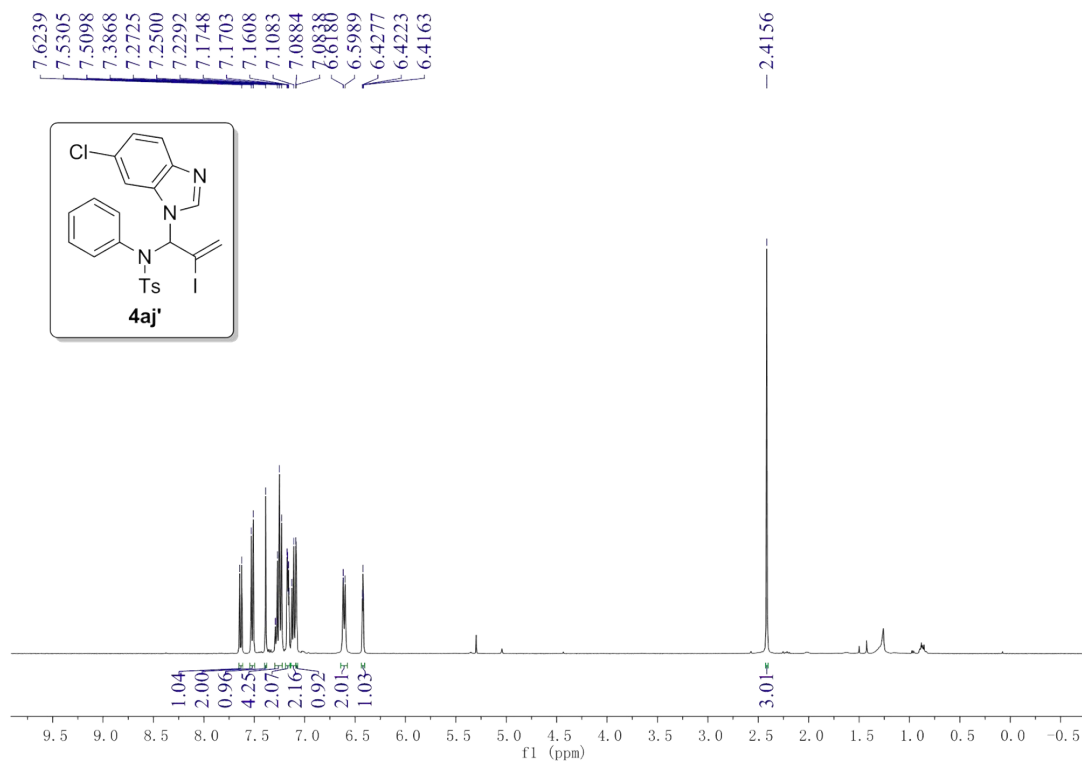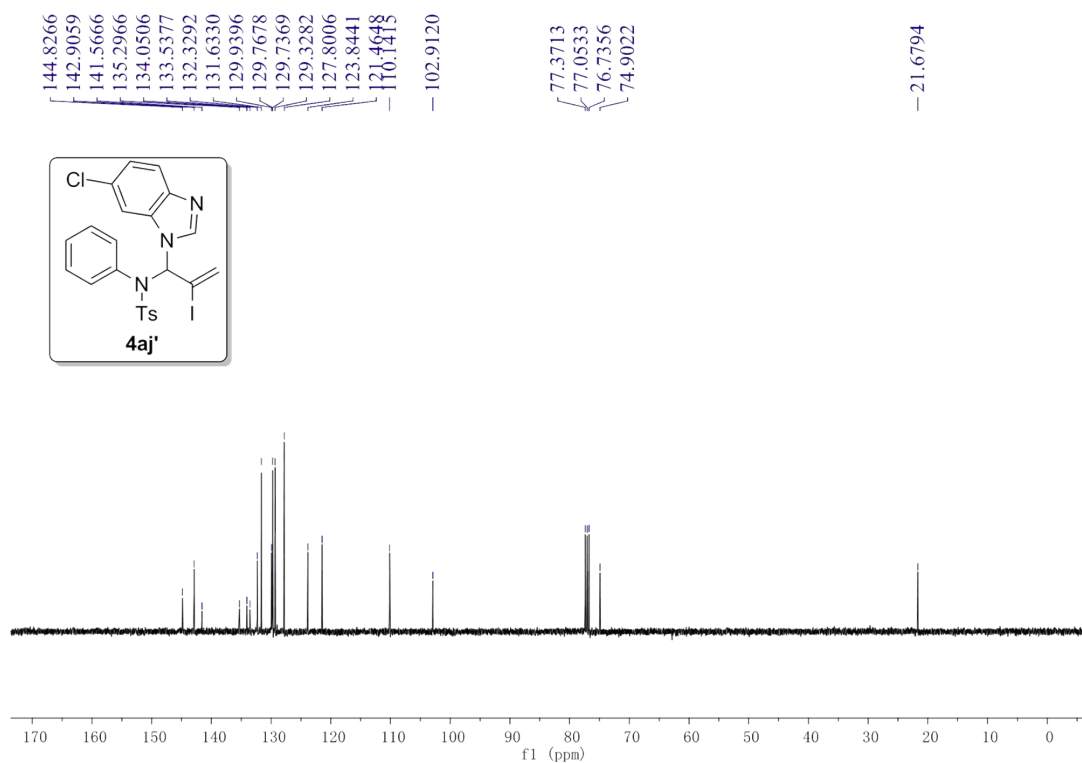



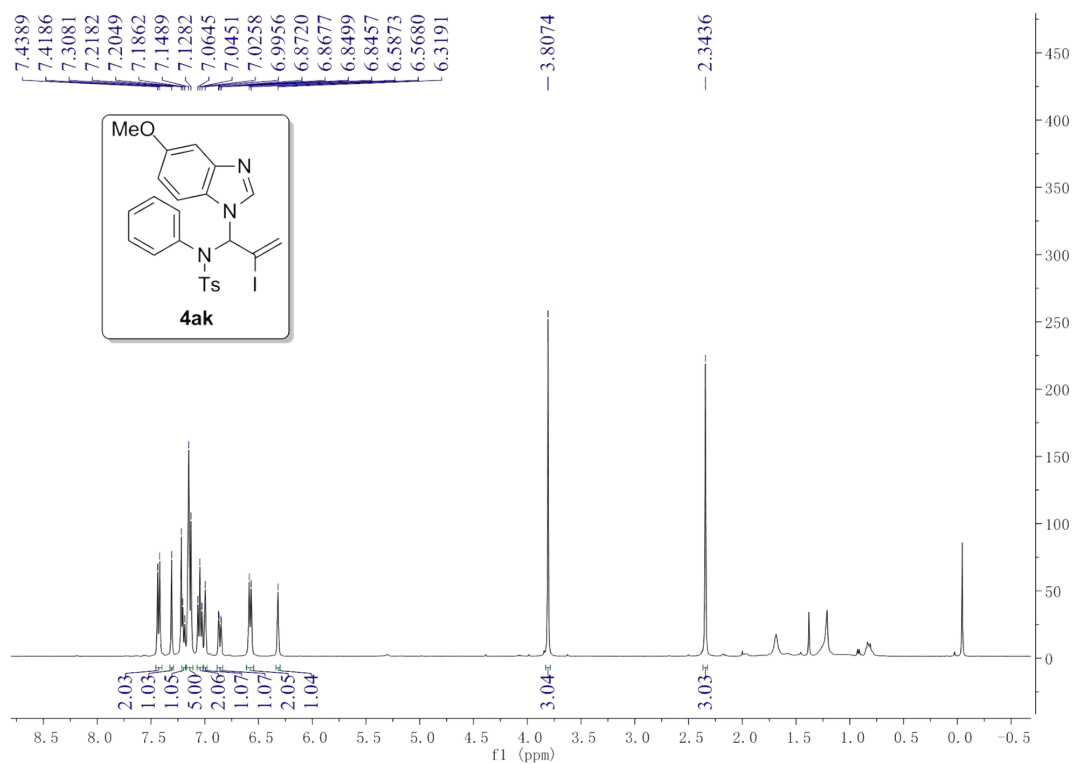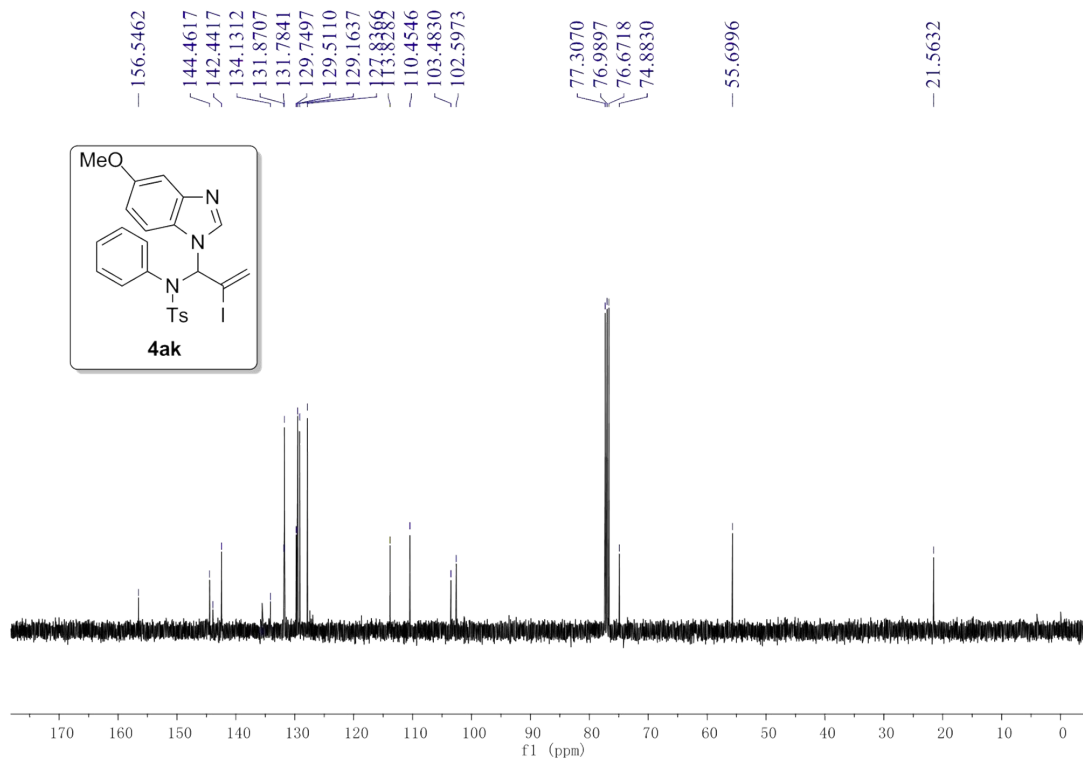

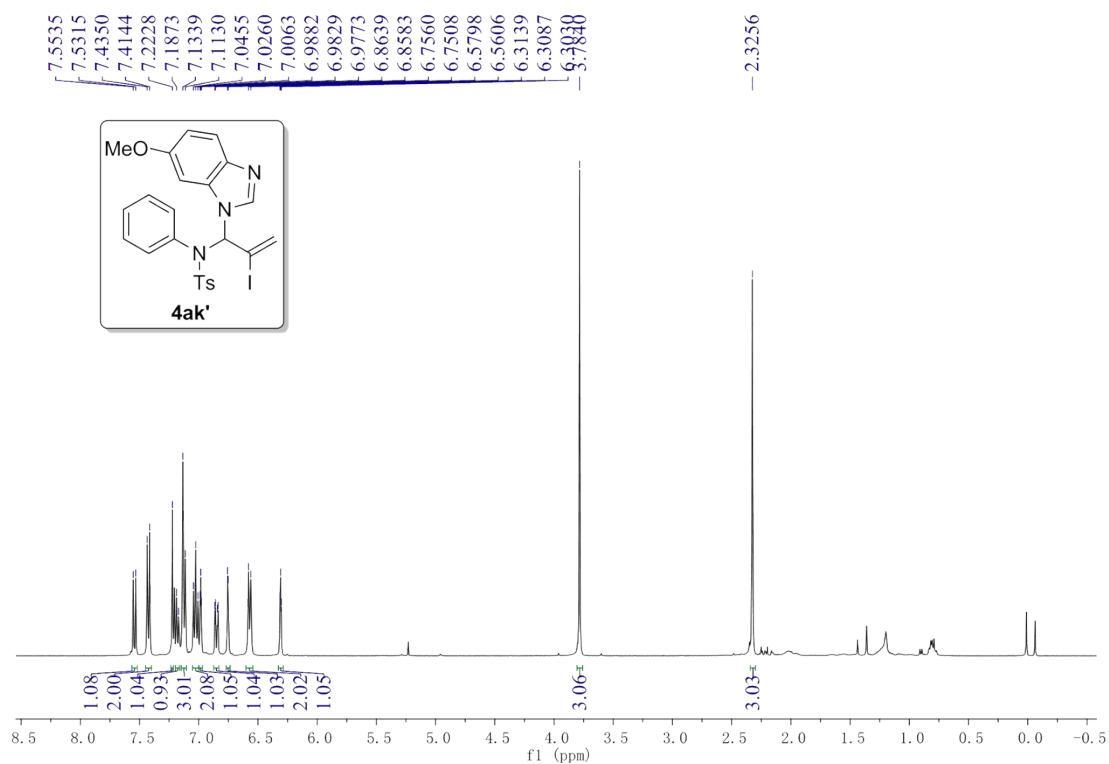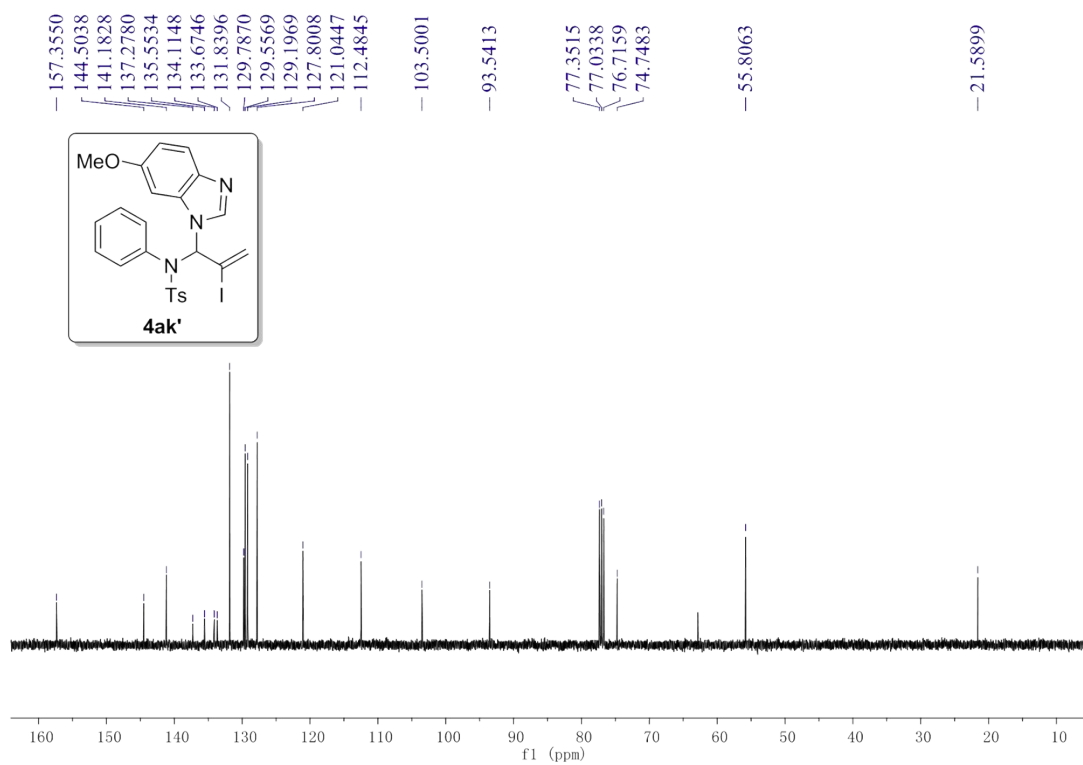



# <sup>1</sup>H and <sup>13</sup>C NMR spectra of 5ah

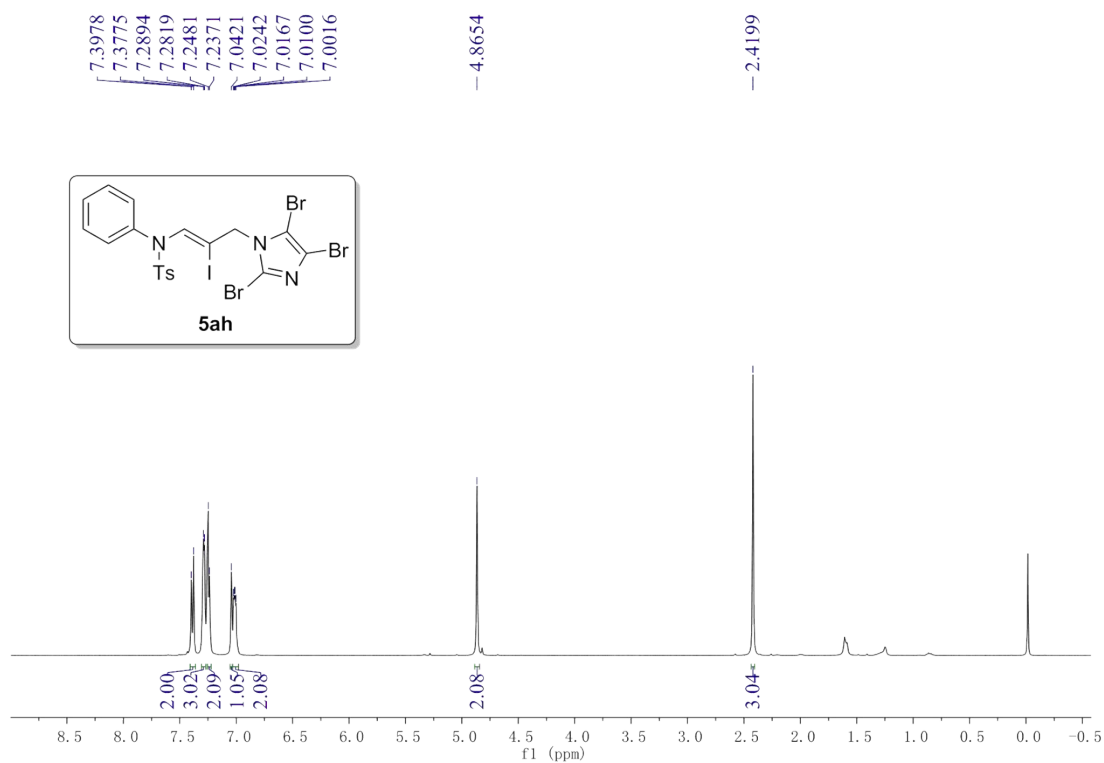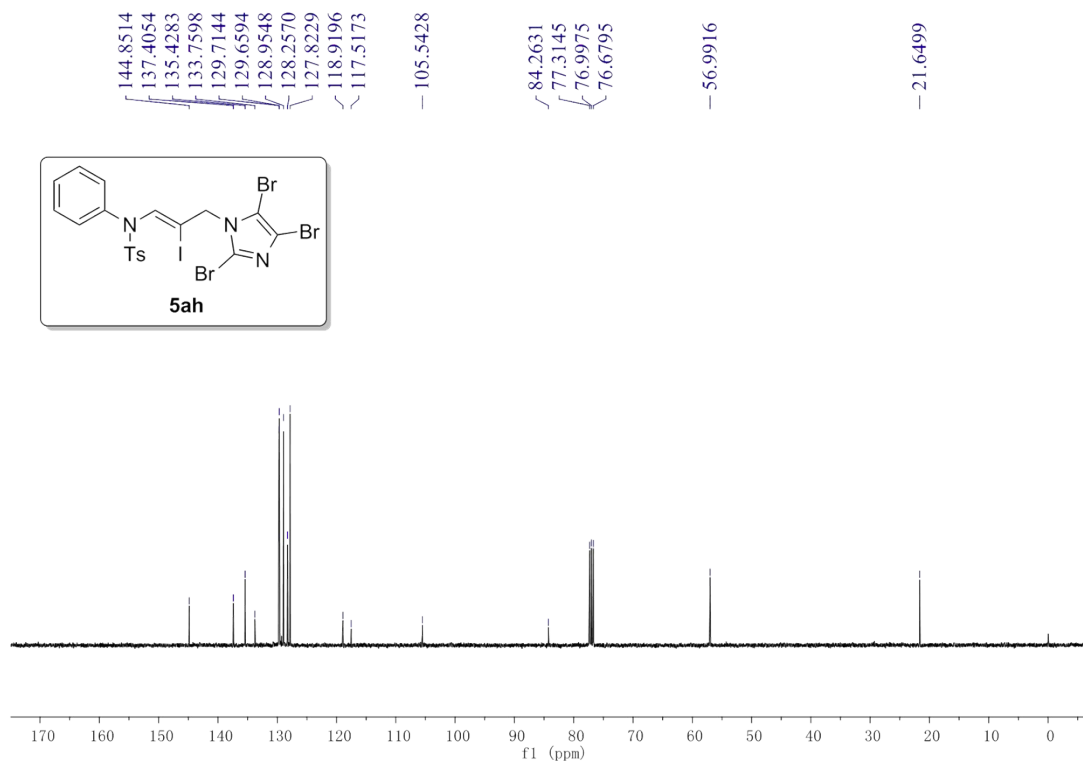

Supplement: c8nj03641a1.pdf [file c8nj03641a1.pdf]
